# Supplementary material for: Multiple MicroRNAs are involved in regulating peanut (Arachis hypogaea L.) resistance to Sclerotium rolfsii at the early stage
Source: Research Square preprint supplement (doi:10.21203/rs.3.rs-1640178/v1), 2022-05-19
Supplement: Supplementary file 1 [file 9ebc3be3700e7eb3a6d3b04c.docx]

Supplementary material

Figure S1. *S. rolfsii* inoculation, sample collection, and the peanut phenotype before and after inoculation. a). *S. rolfsii* inoculation on peanut base using infected oats. b). Peanut stems at the infection part were collected for total RNA extraction. c). The phenotype of peanut before and 7 days after inoculation. DAI, days after inoculation.

Figure S2. The annotation distribution of the total sRNA in each sample.

Table S1. Clean reads and mapping rates of each sample.

Table S2. The expression level of detected miRNAs.

Table S3. List of predicted target genes from DEMs.


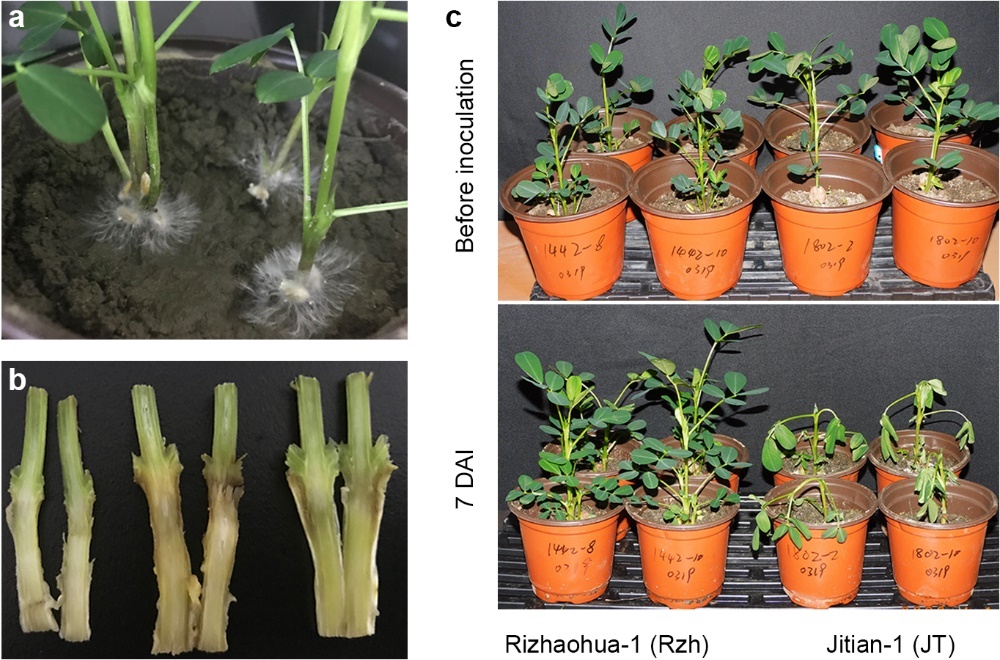


Figure S1. *S. rolfsii* inoculation, sample collection, and the peanut phenotype before and after inoculation. a). *S. rolfsii* inoculation on peanut base using infected oats. b). Peanut stems at the infection part were collected for total RNA extraction. c). The phenotype of peanut before and 7 days after inoculation. DAI, days after inoculation.


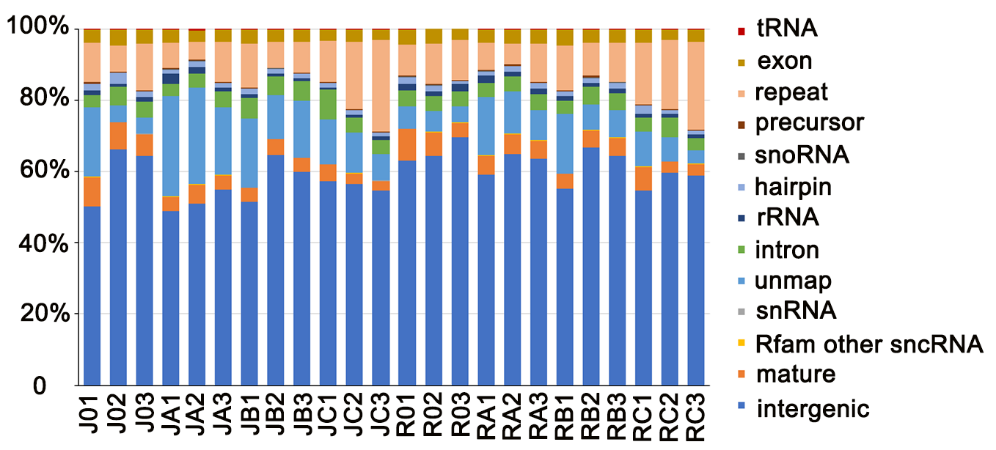


Figure S2. The annotation distribution of the total sRNA in each sample.
