# Supplementary material for: Multiple MicroRNAs are involved in regulating peanut (Arachis hypogaea L.) resistance to Sclerotium rolfsii at the early stage
Source: Research Square preprint supplement (doi:10.21203/rs.3.rs-1640178/v1), 2022-05-19
Supplement: Supplementary file 2 [file ae0002b035fd1399032cf0da.xlsx]

## Sheet: miRNAs list
Table S2. Expression level of detected miRNAs. miRNAs in bold were removed in further analysis.
gene_id	mirbase_id	average_read_count_JT_control	average_read_count_JT_treatA	average_read_count_JT_treatB	average_read_count_JT_treatC	average_read_count_Rzh_control	average_read_count_Rzh_treatA	average_read_count_Rzh_treatB	average_read_count_Rzh_treatC	diffexp_log2fc_Rzh_control-vs-Rzh_treatB	diffexp_degseq_qvalue_Rzh_control-vs-Rzh_treatB	diffexp_degseq_pvalue_Rzh_control-vs-Rzh_treatB	diffexp_log2fc_JT_control-vs-JT_treatA	diffexp_degseq_qvalue_JT_control-vs-JT_treatA	diffexp_degseq_pvalue_JT_control-vs-JT_treatA	diffexp_log2fc_JT_treatB-vs-JT_treatC	diffexp_degseq_qvalue_JT_treatB-vs-JT_treatC	diffexp_degseq_pvalue_JT_treatB-vs-JT_treatC	diffexp_log2fc_JT_treatA-vs-Rzh_treatA	diffexp_degseq_qvalue_JT_treatA-vs-Rzh_treatA	diffexp_degseq_pvalue_JT_treatA-vs-Rzh_treatA	diffexp_log2fc_JT_control-vs-JT_treatC	diffexp_degseq_qvalue_JT_control-vs-JT_treatC	diffexp_degseq_pvalue_JT_control-vs-JT_treatC	diffexp_log2fc_JT_treatC-vs-Rzh_treatC	diffexp_degseq_qvalue_JT_treatC-vs-Rzh_treatC	diffexp_degseq_pvalue_JT_treatC-vs-Rzh_treatC	diffexp_log2fc_Rzh_treatA-vs-Rzh_treatB	diffexp_degseq_qvalue_Rzh_treatA-vs-Rzh_treatB	diffexp_degseq_pvalue_Rzh_treatA-vs-Rzh_treatB	diffexp_log2fc_Rzh_control-vs-Rzh_treatC	diffexp_degseq_qvalue_Rzh_control-vs-Rzh_treatC	diffexp_degseq_pvalue_Rzh_control-vs-Rzh_treatC	diffexp_log2fc_JT_control-vs-JT_treatB	diffexp_degseq_qvalue_JT_control-vs-JT_treatB	diffexp_degseq_pvalue_JT_control-vs-JT_treatB	diffexp_log2fc_Rzh_treatA-vs-Rzh_treatC	diffexp_degseq_qvalue_Rzh_treatA-vs-Rzh_treatC	diffexp_degseq_pvalue_Rzh_treatA-vs-Rzh_treatC	diffexp_log2fc_JT_treatB-vs-Rzh_treatB	diffexp_degseq_qvalue_JT_treatB-vs-Rzh_treatB	diffexp_degseq_pvalue_JT_treatB-vs-Rzh_treatB	diffexp_log2fc_JT_treatA-vs-JT_treatC	diffexp_degseq_qvalue_JT_treatA-vs-JT_treatC	diffexp_degseq_pvalue_JT_treatA-vs-JT_treatC	diffexp_log2fc_Rzh_control-vs-Rzh_treatA	diffexp_degseq_qvalue_Rzh_control-vs-Rzh_treatA	diffexp_degseq_pvalue_Rzh_control-vs-Rzh_treatA	diffexp_log2fc_JT_control-vs-Rzh_control
ahy-miR3510	ahy-MIR3510	0	0	0	0	0.333	0	0	0	NA	NA	NA	NA	NA	NA	NA	NA	NA	NA	NA	NA	NA	NA	NA	NA	NA	NA	NA	NA	NA	NA	NA	NA	NA	NA	NA	NA	NA	NA	NA	NA	NA	NA	NA	NA	NA	NA	NA	NA
ahy-miR3515	ahy-MIR3515	0	0.333	1.333	1	0	1	1.667	0.333	10.703	0.0224588	0.0172303	NA	NA	NA	-0.414677	0.90642	0.85449	1.58641	0.456252	0.392237	NA	NA	NA	-1.58641	0.285525	0.226166	0.737254	0.434315	0.362675	NA	NA	NA	NA	NA	NA	-1.58641	0.459805	0.406565	0.322577	0.916664	0.873695	1.58641	0.274183	0.215937	NA	NA	NA	NA
ahy-miR3520-3p	ahy-MIR3520	0	0.333	1	0.667	0	1	0.333	0	NA	NA	NA	NA	NA	NA	-0.584241	0.846373	0.775842	1.58641	0.456252	0.392237	NA	NA	NA	NA	NA	NA	-1.58641	0.443911	0.372977	NA	NA	NA	NA	NA	NA	NA	NA	NA	-1.58641	0.344623	0.25757	1.00216	0.519861	0.437707	NA	NA	NA	NA
novel-ahy-miR28-5p	novel-ahy-miR28	0	0	0	0	3	3	2.333	1.667	-0.362776	0.84823	0.834766	NA	NA	NA	NA	NA	NA	11.5507	0.00798677	0.0051751	NA	NA	NA	10.703	0.0842661	0.0607603	-0.362776	0.859138	0.828138	-0.847708	0.784031	0.758739	NA	NA	NA	-0.847708	0.525631	0.4869	11.188	0.0234081	0.0146301	NA	NA	NA	0	0.69869	0.650885	11.5507
novel-ahy-miR49-3p	novel-ahy-miR49	0	4.333	0.333	1.667	1	0	1.667	2.667	0.737254	0.262731	0.224503	12.0812	2.84e-05	1.67e-05	2.32366	0.0918817	0.0626901	-12.0812	0.000170137	9.98e-05	10.703	0.00703027	0.00545578	0.677964	0.686488	0.628678	10.703	0.0441905	0.0294983	1.41522	0.0348671	0.0264315	NA	NA	NA	11.381	0.00481961	0.0027903	2.32366	0.160081	0.114224	-1.37811	0.187931	0.142165	NA	NA	NA	NA
ahy-miR3509-3p	ahy-MIR3509	0.333	0.667	1.667	2	1	2	0.333	1	-1.58641	0.543107	0.485635	1.00216	0.36603	0.309427	0.262746	0.670861	0.583509	1.58424	0.28251	0.226296	2.58641	0.00531412	0.00404094	-1	0.249257	0.192846	-2.58641	0.0954028	0.067618	0	0.644653	0.60133	2.32366	0.023242	0.0183746	-1	0.520818	0.4797	-2.32366	0.0984792	0.0677045	1.58424	0.11046	0.0801262	1	0.227753	0.185799	1.58641
novel-ahy-miR52-5p	novel-ahy-miR52	0.333	0.333	0	0	0	0	0	0.333	NA	NA	NA	0	0.746071	0.721074	NA	NA	NA	NA	NA	NA	NA	NA	NA	NA	NA	NA	NA	NA	NA	NA	NA	NA	NA	NA	NA	NA	NA	NA	NA	NA	NA	NA	NA	NA	NA	NA	NA	NA
novel-ahy-miR94-3p	novel-ahy-miR94	0.333	0.333	0.667	0	0.333	0.333	0	0	NA	NA	NA	0	0.746071	0.721074	NA	NA	NA	0	0.926235	0.897881	NA	NA	NA	NA	NA	NA	NA	NA	NA	NA	NA	NA	1.00216	0.312187	0.276228	NA	NA	NA	NA	NA	NA	NA	NA	NA	0	0.896615	0.880099	0
ahy-miR3509-5p	ahy-MIR3509	0.667	1.333	1	0.667	0.667	1.667	0.333	0.333	-1.00216	0.799957	0.774562	0.998918	0.192204	0.150592	-0.584241	0.846373	0.775842	0.322577	0.96207	0.949799	0	0.49884	0.454672	-1.00216	0.525439	0.452154	-2.32366	0.16109	0.120402	-1.00216	0.831027	0.817623	0.584241	0.304513	0.267844	-2.32366	0.179127	0.137645	-1.58641	0.344623	0.25757	-0.998918	0.667948	0.577965	1.3215	0.191288	0.15454	0
novel-ahy-miR22-5p	novel-ahy-miR22	0.667	2.667	2.333	1.333	0.667	1.667	2	1.333	1.58424	0.066034	0.0538055	1.99946	0.00982196	0.00683487	-0.80751	0.596288	0.503118	-0.677964	0.303172	0.245941	0.998918	0.0987911	0.0818114	0	0.812345	0.778141	0.262746	0.636371	0.590448	0.998918	0.214606	0.179992	1.80643	0.0139049	0.0107016	-0.322577	0.98332	0.98332	-0.222186	0.702066	0.625277	-1.00054	0.517135	0.431392	1.3215	0.191288	0.15454	0
ahy-miR3521	ahy-MIR3521	0.667	0.667	0	0	3	0.667	1.333	0.333	-1.17029	0.482447	0.426289	0	0.657696	0.613623	NA	NA	NA	0	0.897174	0.855977	NA	NA	NA	NA	NA	NA	0.998918	0.393837	0.319739	-3.17137	0.0365686	0.0279179	NA	NA	NA	-1.00216	0.717201	0.683228	NA	NA	NA	NA	NA	NA	-2.1692	0.0782113	0.0592759	2.1692
novel-ahy-miR95-5p	novel-ahy-miR95	0.667	0	0.667	1	1.333	0.667	0.667	0	-0.998918	0.72985	0.685441	NA	NA	NA	0.584241	0.633256	0.539257	NA	NA	NA	0.584241	0.224901	0.196789	NA	NA	NA	0	0.902847	0.886559	NA	NA	NA	0	0.594273	0.556937	NA	NA	NA	0	0.933582	0.906839	NA	NA	NA	-0.998918	0.618796	0.566687	0.998918
novel-ahy-miR44-5p	novel-ahy-miR44	0.667	0	0	0	0	0	0	0	NA	NA	NA	NA	NA	NA	NA	NA	NA	NA	NA	NA	NA	NA	NA	NA	NA	NA	NA	NA	NA	NA	NA	NA	NA	NA	NA	NA	NA	NA	NA	NA	NA	NA	NA	NA	NA	NA	NA	NA
novel-ahy-miR240-5p	novel-ahy-miR240	1	0	0	0	0	0	0.333	0	NA	NA	NA	NA	NA	NA	NA	NA	NA	NA	NA	NA	NA	NA	NA	NA	NA	NA	NA	NA	NA	NA	NA	NA	NA	NA	NA	NA	NA	NA	NA	NA	NA	NA	NA	NA	NA	NA	NA	NA
ahy-miR3512	ahy-MIR3512	1	2.667	2	0.667	1.667	2.333	1.667	3.667	0	0.624202	0.57136	1.41522	0.0259018	0.0188255	-1.58424	0.284661	0.21053	-0.193032	0.606958	0.541927	-0.584241	0.751015	0.715811	2.45884	0.033173	0.0207767	-0.484932	0.774245	0.738326	1.13735	0.0250361	0.0184406	1	0.0721504	0.0593069	0.652414	0.20751	0.164915	-0.262746	0.700401	0.620147	-1.99946	0.136828	0.0999626	0.484932	0.397981	0.343521	0.737254
novel-ahy-miR225-3p	novel-ahy-miR225	1	0.333	0	0.333	2	0.667	0.667	1.667	-1.58424	0.373495	0.324091	-1.58641	0.621079	0.569856	NA	NA	NA	1.00216	0.719368	0.666149	-1.58641	0.750154	0.718898	2.32366	0.181687	0.134831	0	0.902847	0.886559	-0.262746	0.719424	0.688481	NA	NA	NA	1.3215	0.19943	0.15587	NA	NA	NA	0	0.905003	0.872179	-1.58424	0.285976	0.242327	1
novel-ahy-miR10-5p	novel-ahy-miR10	1	1.667	0	0	1.333	1.333	0.667	2.333	-0.998918	0.72985	0.685441	0.737254	0.195676	0.154322	NA	NA	NA	-0.322577	0.599751	0.544671	NA	NA	NA	11.188	0.02945	0.01798	-0.998918	0.572523	0.512024	0.80751	0.131144	0.106466	NA	NA	NA	0.80751	0.260607	0.209857	NA	NA	NA	-10.703	0.0896259	0.0640848	0	0.792071	0.762889	0.414677
ahy-miR3517	ahy-MIR3517	1.333	0	0.667	0.667	1.667	0.667	1	1.667	-0.737254	0.845108	0.827222	NA	NA	NA	0	0.925132	0.881766	NA	NA	NA	-0.998918	0.977366	0.969731	1.3215	0.439796	0.365725	0.584241	0.601055	0.543738	0	0.553542	0.499974	-0.998918	0.900621	0.886475	1.3215	0.19943	0.15587	0.584241	0.808209	0.749277	NA	NA	NA	-1.3215	0.426621	0.374977	0.322577
novel-ahy-miR117-3p	novel-ahy-miR117	1.333	0.333	0	0.667	0.333	0.667	0	0.333	NA	NA	NA	-2.00108	0.420895	0.366656	NA	NA	NA	1.00216	0.719368	0.666149	-0.998918	0.977366	0.969731	-1.00216	0.525439	0.452154	NA	NA	NA	0	0.783987	0.762912	NA	NA	NA	-1.00216	0.717201	0.683228	NA	NA	NA	1.00216	0.519861	0.437707	1.00216	0.497273	0.444928	-2.00108
novel-ahy-miR163-3p	novel-ahy-miR163	1.333	0	0.333	0	0	0	0	0	NA	NA	NA	NA	NA	NA	NA	NA	NA	NA	NA	NA	NA	NA	NA	NA	NA	NA	NA	NA	NA	NA	NA	NA	-2.00108	0.442723	0.407954	NA	NA	NA	NA	NA	NA	NA	NA	NA	NA	NA	NA	NA
novel-ahy-miR14-5p	novel-ahy-miR14	1.667	4.333	5.667	5	4.333	4	4	7.667	-0.115366	0.542854	0.488282	1.37811	0.00456482	0.0030589	-0.180657	0.967449	0.947294	-0.240766	0.588128	0.513112	1.58467	0.000131738	8.99e-05	0.616734	0.548205	0.484729	0.1254	0.766253	0.726755	0.823296	0.00479526	0.00317106	1.76533	0.000119207	8.05e-05	1.06406	0.0201877	0.0129627	-0.502585	0.288512	0.213378	0.206562	0.396686	0.326804	-0.240766	0.776275	0.739504	1.37811
novel-ahy-miR51-5p	novel-ahy-miR51	1.667	2	0.667	2	0.333	0.333	0.667	0	1.00216	0.42613	0.374273	0.262746	0.303554	0.253483	1.58424	0.142594	0.100261	-2.58641	0.0398697	0.0286818	0.262746	0.141295	0.121425	-10.9658	0.0204912	0.0122947	1.00216	0.5449	0.481703	NA	NA	NA	-1.3215	0.690804	0.661869	NA	NA	NA	0	0.933582	0.906839	0	0.77368	0.693506	0	0.896615	0.880099	-2.32366
novel-ahy-miR4-3p	novel-ahy-miR4	1.667	1	1	0.667	1	0.333	0	1	NA	NA	NA	-0.737254	0.984688	0.984688	-0.584241	0.846373	0.775842	-1.58641	0.288695	0.232724	-1.3215	0.828788	0.802889	0.584241	0.845288	0.818595	NA	NA	NA	0	0.644653	0.60133	-0.737254	0.931664	0.926786	1.58641	0.27252	0.222319	NA	NA	NA	-0.584241	0.88399	0.842767	-1.58641	0.460492	0.408383	-0.737254
novel-ahy-miR29-3p	novel-ahy-miR29	2	3.667	3.667	3	1	0	1.667	1	0.737254	0.262731	0.224503	0.8746	0.0322534	0.0239407	-0.289638	0.941611	0.907282	-11.8404	0.000622609	0.000384366	0.584963	0.0320518	0.0253743	-1.58496	0.0548056	0.0360563	10.703	0.0441905	0.0294983	0	0.644653	0.60133	0.8746	0.0194476	0.0150694	NA	NA	NA	-1.13735	0.115194	0.0809957	-0.289638	0.96842	0.953366	NA	NA	NA	-1
novel-ahy-miR95-3p	novel-ahy-miR95	3.333	3	4.333	2	3.667	9.333	2	4.667	-0.8746	0.659066	0.610246	-0.151859	0.435521	0.386132	-1.11537	0.258767	0.188684	1.63738	0.0106821	0.00708508	-0.736821	0.701325	0.664798	1.2225	0.21941	0.16398	-2.22234	0.000663829	0.000366133	0.347895	0.118474	0.0949068	0.378545	0.0507262	0.0411653	-0.999845	0.166155	0.126803	-1.11537	0.0900324	0.0611939	-0.584963	0.783984	0.731177	1.34774	0.000988902	0.000655798	0.137779
novel-ahy-miR5-5p	novel-ahy-miR5	3.667	15	21	13.667	0	0.333	0.667	0.667	NA	NA	NA	2.03229	2.06e-10	1.08e-10	-0.619693	0.21862	0.155995	-5.4933	5.86e-13	2.51e-13	1.89802	1.22e-11	6.73e-12	-4.35687	1.81e-11	6.57e-12	1.00216	0.5449	0.481703	NA	NA	NA	2.51772	1.75e-17	8.44e-18	1.00216	0.487823	0.446743	-4.97656	8.89e-17	2.73e-17	-0.134266	0.621039	0.534158	NA	NA	NA	-11.8404
novel-ahy-miR12-3p	novel-ahy-miR12	3.667	1.333	3	2.333	2	1.667	3	1	0.584963	0.170559	0.141682	-1.45992	0.396735	0.341519	-0.362776	0.898357	0.837531	0.322577	0.96207	0.949799	-0.652414	0.593314	0.556232	-1.22219	0.152609	0.112449	0.847708	0.233487	0.180531	-1	0.716554	0.689587	-0.289638	0.429443	0.393469	-0.737254	0.715249	0.67384	0	0.852798	0.80394	0.80751	0.254852	0.199392	-0.262746	0.959759	0.959759	-0.8746
ahy-miR156a	ahy-MIR156a	4.333	1	4.333	6	3.333	1.333	2	3.333	-0.736821	0.795448	0.75757	-2.11537	0.106134	0.0820623	0.469596	0.257813	0.189331	0.414677	0.921145	0.888247	0.469596	0.00366051	0.00272632	-0.848141	0.0610653	0.0411387	0.585323	0.461961	0.390524	0	0.390506	0.340118	0	0.155396	0.134243	1.32214	0.0616249	0.0447591	-1.11537	0.0900324	0.0611939	2.58496	0.000196285	0.000103736	-1.32214	0.253652	0.209597	-0.378545
novel-ahy-miR117-5p	novel-ahy-miR117	5	3	2.333	2.667	1	2.667	3.667	3.667	1.8746	0.00640722	0.00471219	-0.736966	0.978525	0.973482	0.193032	0.668375	0.584828	-0.169745	0.605201	0.53727	-0.90671	0.839453	0.817592	0.459382	0.825327	0.79492	0.459382	0.394889	0.317539	1.8746	0.00477481	0.00318321	-1.09974	0.691729	0.666377	0.459382	0.304778	0.251843	0.652414	0.586225	0.482414	-0.169745	0.866664	0.821759	1.41522	0.0799673	0.0610277	-2.32193
novel-ahy-miR55-3p	novel-ahy-miR55	6	10.667	12.333	9.333	4	9.333	8.333	8.667	1.05884	0.00173002	0.00123573	0.83012	0.000260861	0.000161358	-0.402111	0.682769	0.600979	-0.192742	0.279599	0.222538	0.637378	8.18e-05	5.5e-05	-0.106808	0.386233	0.315085	-0.163505	0.920199	0.915455	1.11553	0.000506119	0.000329249	1.03949	3.13e-06	2.02e-06	-0.106808	0.664251	0.618802	-0.565616	0.072161	0.0469798	-0.192742	0.782191	0.717346	1.22234	0.00191487	0.00129002	-0.584963
novel-ahy-miR31-3p	novel-ahy-miR31	6	3	9.333	1.333	1.333	7	4	0	1.58532	0.00844292	0.00638803	-1	0.656393	0.615792	-2.80766	6.94e-05	3.47e-05	1.22239	0.10396	0.0800915	-2.17029	0.115804	0.0971063	NA	NA	NA	-0.807355	0.301476	0.239316	NA	NA	NA	0.637378	0.000712453	0.000503566	-12.7731	1.32e-05	6.68e-06	-1.22234	0.00613418	0.00348242	-1.17029	0.381221	0.310113	2.39268	9.51e-05	5.91e-05	-2.17029
novel-ahy-miR55-5p	novel-ahy-miR55	6.333	3.333	3.667	4.667	5.333	2.667	3.333	4.333	-0.678126	0.800723	0.771067	-0.848141	0.735908	0.699871	0.347895	0.415415	0.331034	-0.321603	0.459628	0.391622	-0.362467	0.243652	0.217002	-0.107129	0.543238	0.477478	0.321603	0.506738	0.438824	-0.299581	0.613456	0.560686	-0.710362	0.936618	0.936618	0.700148	0.152681	0.115716	-0.137779	0.699525	0.626658	0.485674	0.219291	0.169297	-0.99973	0.295376	0.251847	-0.170015
ahy-miR3513-3p	ahy-MIR3513	6.333	3.333	6	5	5.667	12.333	14.667	4	1.37192	1.73e-06	1.13e-06	-0.926068	0.735908	0.699871	-0.263034	0.947395	0.922723	1.88763	0.000733325	0.000460199	-0.340961	0.165939	0.143468	-0.321928	0.339463	0.273357	0.25005	0.203962	0.1556	-0.502585	0.851482	0.842326	-0.0779266	0.126038	0.105582	-1.62445	0.00487006	0.00284514	1.28954	0.00617364	0.00353698	0.585107	0.156135	0.116495	1.12187	0.000673661	0.000436107	-0.160304
novel-ahy-miR53-3p	novel-ahy-miR53	6.667	6.333	0.667	1	0	0.667	1.333	0.333	NA	NA	NA	-0.0741486	0.198341	0.157446	0.584241	0.633256	0.539257	-3.24713	3.28e-05	1.88e-05	-2.73704	0.0219303	0.017133	-1.58641	0.285525	0.226166	0.998918	0.393837	0.319739	NA	NA	NA	-3.32128	0.00228282	0.00172108	-1.00216	0.717201	0.683228	0.998918	0.58771	0.49282	-2.66289	0.00283472	0.00160096	NA	NA	NA	-12.7028
novel-ahy-miR47-5p	novel-ahy-miR47	7.333	5.333	6.667	5	10.333	12	12.667	11.667	0.293816	0.0254261	0.0196413	-0.32209	0.626634	0.578183	-0.41511	0.756621	0.681747	1.17002	0.0397551	0.0288021	-0.41511	0.320205	0.288518	1.22243	0.0432339	0.0277607	0.0780405	0.467228	0.397385	0.175174	0.0342687	0.0257937	0	0.132172	0.11245	-0.0406008	0.488097	0.444426	0.925965	0.0766634	0.0511089	-0.0930192	0.738509	0.650501	0.215775	0.174316	0.137618	0.63215
novel-ahy-miR83-5p	novel-ahy-miR83	7.333	9.667	6.667	11.333	1	32	9.333	21.667	3.22234	3.7e-08	2.33e-08	0.398665	0.0076023	0.00525107	0.76542	0.0223098	0.0140599	1.71184	3.34e-07	1.71e-07	0.628054	1.46e-05	9.55e-06	0.93497	0.0447749	0.0289859	-1.76257	5.85e-08	2.78e-08	4.43743	2.04e-20	9.2e-21	-0.137366	0.132172	0.11245	-0.547481	0.30622	0.254646	0.485303	0.560722	0.449746	0.22939	0.166458	0.125059	4.98491	1.62e-26	6.22e-27	-2.8744
novel-ahy-miR63-3p	novel-ahy-miR63	7.667	2.333	5.333	6	8.333	8	6.667	2	-0.321798	0.704759	0.656284	-1.71648	0.0997389	0.0766036	0.170015	0.531363	0.437268	1.77781	0.0109792	0.00733815	-0.3537	0.134294	0.11471	-1.58496	0.00538162	0.0030307	-0.262962	0.904279	0.894956	-2.05884	0.0165181	0.0119001	-0.523715	0.538166	0.501537	-2	0.00651111	0.00383813	0.32209	0.805043	0.750535	1.36278	0.00917811	0.00537371	-0.058836	0.599993	0.54631	0.120174
novel-ahy-miR32-5p	novel-ahy-miR32	11	8.667	5	2.333	8.667	7.667	4.333	2.667	-1.00017	0.349886	0.301754	-0.343899	0.369779	0.314503	-1.09974	0.226911	0.164274	-0.176871	0.351848	0.287223	-2.23725	0.0236912	0.0186322	0.193032	0.90415	0.899391	-0.823296	0.264926	0.207571	-1.70031	0.0515532	0.0399121	-1.1375	0.505599	0.46854	-1.52344	0.0382869	0.0270023	-0.206562	0.589987	0.491656	-1.89335	0.00807151	0.00468398	-0.176871	0.785038	0.751984	-0.343899
novel-ahy-miR91-3p	novel-ahy-miR91	12	8.333	5	5.333	12.333	18.333	8	12.667	-0.624452	0.796257	0.762553	-0.526127	0.64886	0.602035	0.0930192	0.643071	0.552639	1.11109	0.0129406	0.00878109	-1.17002	0.784574	0.75597	1.24806	0.0306201	0.0190167	-1.16993	0.0057003	0.00337904	0.0385511	0.063541	0.0495347	-1.26303	0.333365	0.296712	-0.506922	0.48769	0.441488	0.678072	0.365996	0.276404	-0.643889	0.568759	0.486244	0.545473	0.00535145	0.00371785	0.0394894
ahy-miR3519	ahy-MIR3519	14.667	15	17.333	18	26.333	18.667	41	27.333	0.638752	2.63e-08	1.64e-08	0.0323887	0.0179976	0.0128024	0.0544755	0.420157	0.337001	0.315528	0.896147	0.850425	0.295423	3.42e-06	2.19e-06	0.602647	0.26366	0.205378	1.13513	4.78e-09	2.05e-09	0.0537719	0.00479929	0.00322533	0.240948	0.0003018	0.000210154	0.550154	0.00102561	0.000566782	1.2421	5.56e-06	2.49e-06	0.263034	0.0612579	0.0415792	-0.496382	0.497117	0.447406	0.844298
novel-ahy-miR96-5p	novel-ahy-miR96	16.333	8	8	6.333	1	2.333	2	1	1	0.150016	0.123823	-1.02972	0.418725	0.362607	-0.337111	0.842092	0.78069	-1.77781	0.000522551	0.000311931	-1.36683	0.405759	0.367719	-2.66289	0.000132375	6.83e-05	-0.222186	0.983217	0.983217	0	0.644653	0.60133	-1.02972	0.593213	0.559049	-1.22219	0.387903	0.33278	-2	0.000452196	0.000228453	-0.337111	0.982191	0.982191	1.22219	0.137203	0.107596	-4.02972
novel-ahy-miR38-3p	novel-ahy-miR38	19	5	19	12.667	5.667	8.333	14.333	12.667	1.33868	3.02e-06	1.98e-06	-1.926	0.00177435	0.00114327	-0.584925	0.288056	0.214542	0.736908	0.370015	0.303941	-0.584925	0.132551	0.112531	0	0.454558	0.385179	0.782433	0.00911849	0.00549929	1.16042	1.58e-05	9.86e-06	0	0.00228862	0.00171347	0.604167	0.0207703	0.013446	-0.406659	0.0717108	0.0470602	1.34107	0.000116981	6.12e-05	0.556251	0.0717874	0.0540295	-1.74534
novel-ahy-miR241-5p	novel-ahy-miR241	19.333	13.667	7.333	6.333	11.333	18.667	8.667	9	-0.386925	0.776562	0.735475	-0.500369	0.5056	0.45087	-0.211514	0.99509	0.99509	0.449793	0.590986	0.521635	-1.6101	0.117529	0.0991649	0.507036	0.666136	0.606535	-1.10689	0.0103354	0.0062865	-0.332533	0.502646	0.4513	-1.39859	0.107307	0.089329	-1.05249	0.0313038	0.0214184	0.241129	0.909641	0.862264	-1.10974	0.0615626	0.042105	0.71996	0.00128175	0.000856751	-0.770536
novel-ahy-miR87-5p	novel-ahy-miR87	2	61	40.333	56	3	58.333	38	41	3.65027	3.91e-31	1.74e-31	4.93074	2.25e-58	6.85e-59	0.464862	0.000110153	5.57e-05	-0.0727563	0.0442815	0.0323074	4.79875	4.59e-62	1.6e-62	-0.441198	2.89e-05	1.43e-05	-0.622752	0.0253362	0.0160636	3.77259	1.37e-35	5.51e-36	4.33389	1.39e-40	5.31e-41	-0.500429	0.269083	0.218099	-0.0986596	0.2428	0.175777	-0.131987	0.237334	0.184456	4.27302	2.67e-45	8.3e-46	0.584963
novel-ahy-miR5-3p	novel-ahy-miR5	14.667	35	16.333	17.333	0	5.333	2.333	1	11.188	0.00481299	0.00351425	1.24099	1.21e-15	5.86e-16	0.0857316	0.380768	0.295492	-2.70054	2.28e-20	8.27e-21	0.240948	1.04e-05	6.8e-06	-4.11545	6.34e-14	2.1e-14	-1.19276	0.155002	0.115053	NA	NA	NA	0.155216	0.00107256	0.000780557	-2.41495	0.0102575	0.00626247	-2.80753	9e-10	3.33e-10	-1.00004	0.00644558	0.00370704	12.3807	1.9e-05	1.15e-05	-13.8403
novel-ahy-miR94-5p	novel-ahy-miR94	15.667	34	17	4.333	19.333	16.667	39.333	6.667	1.02467	8.62e-12	4.97e-12	1.11781	5.98e-14	2.96e-14	-1.9721	2.53e-05	1.2e-05	-1.05774	1.72e-07	8.62e-08	-1.85429	0.0512536	0.0416435	0.621671	0.568795	0.508922	1.26795	1.24e-09	5.22e-10	-1.53596	0.0103899	0.00731758	0.117806	0.00123368	0.00090427	-1.29268	0.00795062	0.00481222	1.21021	1.48e-05	6.79e-06	-2.9721	1.11e-14	4.24e-15	-0.243276	0.778904	0.737909	0.303337
novel-ahy-miR101-5p	novel-ahy-miR101	20.333	12.667	12.667	6	2	3	6.333	3.667	1.66289	0.000647935	0.00044567	-0.658925	0.924052	0.905	-1.07804	0.0467025	0.030162	-2.07804	1.5e-06	7.78e-07	-1.73697	0.0457351	0.0369216	-0.710362	0.0909675	0.0660712	1.07793	0.0352851	0.0227353	0.8746	0.047046	0.0361698	-0.658925	0.638778	0.608679	0.289638	0.411247	0.3593	-1.00011	0.00536293	0.00296078	-1.07804	0.083164	0.0590335	0.584963	0.28047	0.234709	-3.32193
novel-ahy-miR51-3p	novel-ahy-miR51	20.667	12	12	8.667	4.333	7	7.667	9.333	0.823296	0.00809098	0.00607894	-0.760789	0.840647	0.818981	-0.46943	0.586102	0.488418	-0.777608	0.011078	0.00746068	-1.23022	0.548015	0.502347	0.106808	0.693797	0.646327	0.131307	0.509309	0.438426	1.10697	0.000316601	0.000204258	-0.760789	0.892937	0.874236	0.414986	0.111523	0.0827616	-0.6463	0.0507338	0.0319728	-0.46943	0.775101	0.698796	0.691989	0.0619744	0.0459915	-2.23038
novel-ahy-miR130-5p	novel-ahy-miR130	20.667	6	7	4.333	5.333	12.667	7.667	4.667	0.523715	0.0319147	0.0249914	-1.78429	0.00325531	0.00214783	-0.691989	0.419294	0.340676	1.03949	0.0547713	0.0402401	-2.25389	0.00153498	0.00111126	0.107129	0.787003	0.745582	-0.68579	0.216456	0.166247	-0.192452	0.479153	0.425055	-1.5619	0.0348613	0.0279255	-1.40196	0.0116776	0.00719097	0.131307	0.946161	0.931377	-0.469596	0.831791	0.784383	1.2095	0.00023102	0.000147731	-1.95431
novel-ahy-miR34-5p	novel-ahy-miR34	21	21.333	22.333	10.333	1.333	4	11.667	7.333	3.12968	1e-09	6.09e-10	0.0226975	0.00493807	0.00333447	-1.11192	0.00508208	0.00293808	-2.41501	1.03e-11	4.53e-12	-1.02313	0.957298	0.94234	-0.494784	0.0721408	0.0497392	1.54436	0.000192555	0.00010124	2.45973	5.33e-06	3.21e-06	0.0887877	0.000300115	0.000210552	0.874404	0.0293773	0.019791	-0.936743	0.000324959	0.000160787	-1.04583	0.028817	0.0183652	1.58532	0.0202415	0.0143821	-3.97764
ahy-miR408-5p	ahy-MIR408	21	8.333	14	4.667	1.667	10	15.667	12	3.2324	7.72e-13	4.37e-13	-1.33348	0.0709847	0.0534215	-1.58486	0.00170535	0.000923733	0.263092	0.996464	0.996464	-2.16982	0.00258323	0.00191051	1.36247	0.0206098	0.0122574	0.647729	0.0163625	0.0102898	2.84771	6.52e-10	3.5e-10	-0.584963	0.418134	0.378729	0.263034	0.148167	0.111515	0.162302	0.988404	0.983256	-0.836341	0.34708	0.278743	2.58467	1.18e-06	6.55e-07	-3.65506
novel-ahy-miR91-5p	novel-ahy-miR91	21	21	28	25.667	31.333	43	54	47	0.785276	1.87e-12	1.07e-12	0	0.00670929	0.00459967	-0.125512	0.768084	0.696076	1.03395	0.000522509	0.000314572	0.289525	2.85e-08	1.75e-08	0.862488	0.00573265	0.00328873	0.328623	0.00283442	0.00162176	0.57472	4.2e-10	2.19e-10	0.415037	1.76e-07	1.08e-07	0.118066	0.0215833	0.0140859	0.947533	7.68e-05	3.68e-05	0.289525	0.0184584	0.0113811	0.456654	0.00012997	8.21e-05	0.577294
novel-ahy-miR46-5p	novel-ahy-miR46	23.333	22	33.333	26.333	25	30.333	31	40.333	0.31034	0.000298333	0.000203624	-0.0848683	0.0133881	0.00945445	-0.325594	0.648289	0.5605	0.463385	0.454059	0.382244	0.1745	1.63e-07	1.03e-07	0.615089	0.151222	0.110631	0.03138	0.331391	0.264771	0.690033	6.34e-10	3.34e-10	0.500094	1.31e-09	7.57e-10	0.411073	0.000606388	0.000331917	-0.0901978	0.257606	0.187838	0.259368	0.0229126	0.0142462	0.27896	0.0125631	0.0088603	0.0995563
novel-ahy-miR93-3p	novel-ahy-miR93	24.667	20.333	34	166.667	66.333	92.667	127.667	352.333	0.932886	1.35e-32	5.79e-33	-0.302582	0.0963997	0.073542	2.29047	1.09e-75	2.21e-76	2.1964	1.11e-26	3.46e-27	2.75342	3.26e-156	7.98e-157	1.06363	2.77e-25	7.74e-26	0.458949	7.42e-09	3.21e-09	2.39717	2.19e-224	4.12e-225	0.462952	2.79e-09	1.64e-09	1.92323	1.07e-142	1.81e-143	1.88982	1.47e-32	3.51e-33	3.056	4.42e-105	8.02e-106	0.473936	5.17e-09	2.69e-09	1.41988
novel-ahy-miR7-3p	novel-ahy-miR7	24.667	49	38	42.667	8	25.333	42.667	29.333	2.40371	1.04e-26	4.96e-27	1.00003	8.5e-18	3.99e-18	0.158454	0.0609029	0.0396503	-0.941926	1.95e-09	9.06e-10	0.775991	1.06e-19	5.06e-20	-0.522852	5.64e-05	2.82e-05	0.740765	5.98e-06	3.05e-06	1.85798	1.56e-16	7.28e-17	0.617537	5.78e-12	3.18e-12	0.195035	0.032418	0.022522	0.181331	0.993204	0.993204	-0.224039	0.544457	0.462648	1.66295	5.04e-10	2.49e-10	-1.60484
novel-ahy-miR165-3p	novel-ahy-miR165	24.667	7.333	7.667	16.333	28	9	10	13	-1.48543	0.000931735	0.000660596	-1.75011	0.00171531	0.00109639	1.09106	0.000390417	0.000205376	0.295521	0.953476	0.934017	-0.594792	0.0939132	0.0772827	-0.329278	0.0668243	0.0453702	0.152003	0.420791	0.349213	-1.10692	0.0781641	0.0617749	-1.68585	0.00781848	0.00597643	0.530515	0.0291538	0.0197939	0.383266	0.673652	0.589445	1.15531	5.76e-05	2.96e-05	-1.63743	1.08e-05	6.39e-06	0.182845
novel-ahy-miR60-5p	novel-ahy-miR60	26.333	1.667	3	0.333	0	1.333	0.333	0	NA	NA	NA	-3.98155	8.78e-13	4.39e-13	-3.17137	0.0195006	0.0119847	-0.322577	0.599751	0.544671	-6.30521	4.03e-15	2.1e-15	NA	NA	NA	-2.00108	0.270062	0.212987	NA	NA	NA	-3.13384	4.48e-09	2.67e-09	NA	NA	NA	-3.17137	0.00781492	0.0045587	-2.32366	0.187053	0.14247	NA	NA	NA	-14.6846
novel-ahy-miR21-5p	novel-ahy-miR21	28.333	19	19.667	15.333	26	20.667	19	18.333	-0.452512	0.830932	0.80895	-0.576484	0.612251	0.5586	-0.359137	0.686648	0.607969	0.12133	0.648976	0.595999	-0.885843	0.569713	0.525205	0.257803	0.919751	0.919751	-0.12133	0.782147	0.749893	-0.504069	0.708942	0.674638	-0.526706	0.231606	0.201291	-0.172886	0.670453	0.628109	-0.0497775	0.527027	0.414484	-0.309359	0.96993	0.949828	-0.331183	0.925502	0.920631	-0.123972
novel-ahy-miR17-5p	novel-ahy-miR17	31	59	47.667	103.667	21	39.333	56.333	106	1.39775	5.12e-22	2.6e-22	0.920281	3.85e-20	1.73e-20	1.12638	5.62e-21	1.79e-21	-0.576809	1.13e-06	5.83e-07	1.73696	4.77e-75	1.59e-75	0.0367632	0.0416464	0.0265222	0.4924	4.67e-05	2.43e-05	2.3356	5.35e-67	1.67e-67	0.610578	1.23e-14	6.44e-15	1.43025	6.98e-32	2.2e-32	0.225294	0.718091	0.65825	0.81668	2.49e-17	8.76e-18	0.905351	5.87e-08	3.15e-08	-0.561879
novel-ahy-miR133-3p	novel-ahy-miR133	31.333	46.667	28.333	23.667	18	55.667	36.667	32.333	1.02649	4.24e-11	2.49e-11	0.57472	1.11e-11	5.68e-12	-0.259607	0.900705	0.844411	0.245737	0.971586	0.966628	-0.404806	0.00457104	0.00342828	0.450131	0.53475	0.464389	-0.593658	0.0360105	0.0233883	0.84501	1.61e-09	8.84e-10	-0.1452	0.00161771	0.00119422	-0.775133	0.0120237	0.00753061	0.371999	0.423956	0.326799	-0.979526	0.00243262	0.00136126	1.62014	4.46e-20	1.83e-20	-0.799686
novel-ahy-miR47-3p	novel-ahy-miR47	33.667	33.667	34.667	27	52.333	115	82.333	160.333	0.65375	1.11e-15	6.25e-16	0	0.0005297	0.000333111	-0.360604	0.586094	0.491464	1.77223	1.12e-23	3.71e-24	-0.318376	0.000667893	0.000473091	2.57004	2.9e-55	5.64e-56	-0.482091	0.0319305	0.0204092	1.61528	4.59e-74	1.41e-74	0.0422278	1.52e-05	9.92e-06	0.479438	2.42e-14	9.19e-15	1.24791	5.78e-11	2.05e-11	-0.318376	0.972026	0.966989	1.13584	7.43e-27	2.82e-27	0.636386
novel-ahy-miR37-5p	novel-ahy-miR37	34.667	2	6.333	1.667	6.667	3.333	0.667	6	-3.32128	0.000688311	0.000482546	-4.11549	6.01e-17	2.85e-17	-1.92563	0.0146859	0.00871973	0.584963	0.58752	0.515579	-4.37824	1.51e-15	7.79e-16	1.84771	0.0294548	0.018138	-2.1692	0.0428685	0.0280634	-0.152075	0.374537	0.324196	-2.4526	1.03e-07	6.29e-08	1	0.0533463	0.0384655	-3.24713	6.75e-05	3.17e-05	-0.262746	0.966158	0.941128	-1.15208	0.243771	0.200149	-2.37845
novel-ahy-miR7-5p	novel-ahy-miR7	35	44.333	59	45.333	10.333	28.333	47.667	26	2.20573	1.33e-27	6.2e-28	0.343941	1.86e-08	1.03e-08	-0.380153	0.397521	0.310563	-0.63502	7.88e-06	4.34e-06	0.386999	8.29e-15	4.36e-15	-0.80205	1.28e-07	5.66e-08	0.750507	1.69e-06	8.38e-07	1.33125	3.1e-11	1.57e-11	0.767152	4.87e-20	2.25e-20	-0.123972	0.480961	0.430333	-0.307724	0.00574091	0.00319936	0.0430581	0.0600107	0.0404217	1.45522	1.07e-09	5.46e-10	-1.7463
novel-ahy-miR29-5p	novel-ahy-miR29	36	29.667	23	31.333	24.333	15	17.667	17.667	-0.461857	0.852906	0.843881	-0.279138	0.0412247	0.0308123	0.446049	0.00616944	0.00363097	-0.983897	2.18e-06	1.14e-06	-0.200314	2.71e-05	1.79e-05	-0.826626	9.09e-06	4.31e-06	0.236095	0.171411	0.129884	-0.461857	0.615771	0.566112	-0.646363	0.430945	0.392589	0.236095	0.0884279	0.064692	-0.380577	0.0568659	0.0361335	0.0788239	0.0809268	0.0561875	-0.697952	0.182006	0.145605	-0.565083
novel-ahy-miR128-5p	novel-ahy-miR128	38.667	3	1	0.333	0	0.667	1	0	NA	NA	NA	-3.68807	9e-17	4.31e-17	-1.58641	0.459766	0.375955	-2.1692	0.0202003	0.0139135	-6.85944	9.81e-22	4.65e-22	NA	NA	NA	0.584241	0.601055	0.543738	NA	NA	NA	-5.27303	1.81e-21	8.08e-22	NA	NA	NA	0	0.924554	0.886031	-3.17137	0.0246867	0.0154772	NA	NA	NA	-15.2388
ahy-miR156c	ahy-MIR156c	43.333	25	21	37.333	41.667	28.333	38	58.333	-0.145604	0.0500324	0.0405024	-0.793538	0.736747	0.706365	0.830062	5.74e-06	2.63e-06	0.163499	0.774463	0.723095	-0.215015	6.18e-06	3.99e-06	0.643861	0.0570914	0.0378606	0.427874	0.00373006	0.00219189	0.485407	8.36e-11	4.27e-11	-1.04508	0.342592	0.306719	1.05889	7.49e-13	3.03e-13	0.842912	0.00351372	0.00192156	0.578523	4e-05	2.01e-05	-0.573478	0.256274	0.213112	-0.0565609
novel-ahy-miR8-3p	novel-ahy-miR8	44.333	18	18	5.667	16	19	17	8	0.0874628	0.046759	0.0371103	-1.31645	0.0107813	0.00755806	-1.66734	0.000167624	8.64e-05	0.104942	0.579339	0.502488	-2.95685	3.41e-11	1.92e-11	0.497415	0.692625	0.64159	-0.160465	0.893968	0.870927	-1	0.304419	0.258593	-1.28951	0.0377031	0.0303993	-1.24793	0.00780904	0.00468543	-0.0824622	0.476314	0.37212	-1.6404	0.000531368	0.000286333	0.247928	0.0649947	0.048575	-1.45943
novel-ahy-miR59-5p	novel-ahy-miR59	46	31.333	35	29.667	43	58.667	40	46.667	-0.104337	0.0315332	0.0245258	-0.553951	0.437186	0.385355	-0.238496	0.94633	0.906899	0.904866	0.000556076	0.000337618	-0.632775	0.0354311	0.0282341	0.653544	0.0800321	0.0568649	-0.552549	0.0589165	0.0400875	0.118066	4.73e-05	2.98e-05	-0.394279	0.0214145	0.0167056	-0.330146	0.875303	0.861483	0.192645	0.935005	0.900916	-0.0788239	0.304335	0.242838	0.448213	8.93e-06	5.22e-06	-0.0972972
novel-ahy-miR59-3p	novel-ahy-miR59	46.667	2.667	5.333	5.333	1	0.333	0	0	NA	NA	NA	-4.11875	2.06e-22	8.94e-23	0	0.752364	0.673993	-3.00162	0.0107335	0.00706437	-3.11902	7.16e-13	3.91e-13	-12.3807	2.56e-05	1.25e-05	NA	NA	NA	NA	NA	NA	-3.11902	4.89e-15	2.54e-15	NA	NA	NA	-12.3807	4.33e-05	2.01e-05	0.99973	0.0431325	0.028159	-1.58641	0.460492	0.408383	-5.53397
novel-ahy-miR199-5p	novel-ahy-miR199	47.667	16.333	16	9	12	11	11.667	9.667	-0.0406008	0.196077	0.164953	-1.5452	0.000262459	0.000163699	-0.830075	0.100714	0.0697654	-0.570286	0.0140363	0.00959627	-2.40499	9.08e-08	5.72e-08	0.103143	0.687468	0.633194	0.0849301	0.474491	0.406007	-0.311894	0.457248	0.403165	-1.57492	0.000965851	0.00069784	-0.186363	0.776957	0.752421	-0.455638	0.0754272	0.049892	-0.859793	0.154173	0.114232	-0.125531	0.652216	0.600726	-1.98996
novel-ahy-miR46-3p	novel-ahy-miR46	49	21.333	28.333	15.333	14	16.667	19.667	23.667	0.49035	0.0006839	0.000474026	-1.18986	0.0250503	0.0180775	-0.885843	0.0151457	0.00915054	-0.356092	0.0318081	0.0225578	-1.6663	0.00496662	0.00375083	0.626237	0.264376	0.207326	0.238782	0.147601	0.108038	0.75745	9.63e-07	5.64e-07	-0.78046	0.854732	0.832357	0.505882	0.00384039	0.00218296	-0.526706	0.00708074	0.00409355	-0.476447	0.676485	0.588857	0.251568	0.0821896	0.0631562	-1.79752
novel-ahy-miR37-3p	novel-ahy-miR37	52.333	33.667	33	25.333	20.333	15	14.667	8.667	-0.471249	0.888387	0.883686	-0.636386	0.690294	0.651154	-0.381448	0.53714	0.444819	-1.16637	1.76e-08	8.55e-09	-1.0467	0.991087	0.991087	-1.54741	4.74e-09	1.87e-09	-0.0323887	0.625697	0.570868	-1.23022	0.0661189	0.0518998	-0.665255	0.396	0.356607	-0.791358	0.201828	0.159338	-1.16989	2.3e-07	9.57e-08	-0.410317	0.774434	0.702207	-0.438861	0.689459	0.638657	-1.3639
ahy-miR3511-5p	ahy-MIR3511	55.333	22.333	20	10	66.333	35.667	33.333	15	-0.992776	0.00652035	0.00482989	-1.30896	0.00375699	0.0024982	-1	0.0193756	0.0120089	0.675413	0.0806427	0.0613049	-2.46814	2.36e-09	1.43e-09	0.584963	0.444585	0.374387	-0.0976387	0.639485	0.59004	-2.14476	2.65e-13	1.31e-13	-1.46814	0.00192957	0.00143455	-1.24963	0.000194322	0.00010432	0.736951	0.0228268	0.0141478	-1.15918	0.0103364	0.00615897	-0.895137	0.00073241	0.000477994	0.261587
novel-ahy-miR15-3p	novel-ahy-miR15	57.333	54	73.333	34	66.333	79.333	137.333	116.667	1.05364	1.42e-38	5.57e-39	-0.0864064	8.24e-05	4.97e-05	-1.10893	1.76e-07	7.68e-08	0.542799	0.0584957	0.0432749	-0.753831	0.10843	0.0903584	1.77879	2.44e-23	6.95e-24	0.800345	1.34e-17	4.69e-18	0.821859	5.05e-30	2.12e-30	0.355097	2.68e-16	1.33e-16	0.568566	1.88e-12	7.73e-13	0.901641	9.71e-10	3.64e-10	-0.667425	0.0821246	0.0578702	0.253293	6.78e-05	4.18e-05	0.2031
novel-ahy-miR30-3p	novel-ahy-miR30	61.333	1.667	2	1.667	6.667	1.333	0.667	0.333	-3.32128	0.000688311	0.000482546	-5.20134	2.65e-34	1.01e-34	-0.262746	0.965394	0.955338	-0.322577	0.599751	0.544671	-5.20134	1.14e-30	4.79e-31	-2.32366	0.0783901	0.0552856	-0.998918	0.572523	0.512024	-4.32344	0.000155728	9.96e-05	-4.93859	5.65e-32	2.25e-32	-2.00108	0.289721	0.237876	-1.58424	0.154381	0.109353	0	0.779616	0.719024	-2.32236	0.00446655	0.00305606	-3.20155
novel-ahy-miR36-3p	novel-ahy-miR36	62	19.333	62.667	28	56.667	30.667	74	35	0.371954	1.05e-09	6.43e-10	-1.64985	1.74e-06	1.02e-06	-1.17954	4.13e-07	1.83e-07	0.633897	0.114907	0.0896975	-1.13275	0.597044	0.562839	0.339189	0.880726	0.86682	1.2895	1.34e-17	4.64e-18	-0.695154	0.655763	0.620507	0.046794	1.2e-08	7.23e-09	0.222392	0.0249439	0.0164104	0.226757	0.702021	0.617925	0.517101	0.000737474	0.000401217	-0.917546	0.00215263	0.00146153	-0.0984031
novel-ahy-miR220-5p	novel-ahy-miR220	63.333	43.333	64.667	43.667	28.333	32.333	42.333	26.667	0.579299	6.07e-08	3.86e-08	-0.551015	0.344163	0.289168	-0.566486	0.0453583	0.0290577	-0.411329	0.000608715	0.000372682	-0.528808	0.00169575	0.00123648	-0.711488	1.52e-06	6.96e-07	0.388775	0.00364049	0.00212049	-0.0874278	0.0255936	0.0189888	0.0376779	4.17e-09	2.47e-09	-0.277952	0.922187	0.91248	-0.611247	3.7e-06	1.64e-06	0.0222068	0.0820895	0.0574201	0.190524	0.0274861	0.0198189	-1.15287
novel-ahy-miR133-5p	novel-ahy-miR133	79	57.333	61.667	47.667	59.333	75	90.333	52.333	0.60109	4.65e-16	2.58e-16	-0.450254	0.0943043	0.0714574	-0.371508	0.410536	0.325007	0.381105	0.454138	0.384627	-0.716629	0.0376002	0.0301585	0.13473	0.436558	0.360735	0.269454	0.000479998	0.000257318	-0.181114	0.00900164	0.00614628	-0.345122	0.000861639	0.000618034	-0.51275	0.184909	0.143061	0.545426	0.0085577	0.00503656	-0.266375	0.776415	0.708026	0.331636	1.23e-05	7.31e-06	-0.400785
novel-ahy-miR34-3p	novel-ahy-miR34	79.667	42.333	82.667	84.333	14	93.333	50.667	135.667	1.84608	2.84e-25	1.37e-25	-0.906138	0.243263	0.200629	0.0289185	0.0871258	0.0589914	1.1406	6.37e-09	3.02e-09	0.0824682	7.79e-19	3.81e-19	0.684498	0.000815397	0.000442031	-0.890883	3.76e-06	1.9e-06	3.26946	7.76e-107	2e-107	0.0535497	9.55e-12	5.3e-12	0.5325	7.7e-14	3e-14	-0.709966	5.54e-09	2.22e-09	0.988607	9.7e-18	3.32e-18	2.73696	3.44e-54	9.95e-55	-2.50249
novel-ahy-miR65-5p	novel-ahy-miR65	82	23.667	15.667	7	5.333	12.667	7.333	12.333	0.459456	0.0467122	0.0375675	-1.79275	1.43e-09	7.61e-10	-1.1623	0.0152083	0.00910911	-0.901802	6.65e-05	3.84e-05	-3.5502	1.31e-26	5.86e-27	0.817097	0.224315	0.168826	-0.788599	0.164736	0.123977	1.2095	1.44e-05	8.81e-06	-2.38789	1.29e-15	6.48e-16	-0.0385511	0.48125	0.42806	-1.09525	0.000833858	0.000438644	-1.75745	2.5e-05	1.24e-05	1.24806	0.00023102	0.000147731	-3.9426
ahy-miR160-3p	ahy-MIR160	82.333	990	991	1435	114	1121.67	2613	1293.67	4.4881	0	0	3.57422	0	0	0.527767	2.39e-106	4.11e-107	0.181754	0.0349108	0.0249363	4.1059	0	0	-0.144372	3.54e-42	8.21e-43	1.20162	0	0	3.49204	0	0	3.57814	0	0	0.205558	2.56e-50	6.73e-51	1.37945	0	0	0.531683	2.84e-141	3.83e-142	3.28648	0	0	0.469491
novel-ahy-miR217-5p	novel-ahy-miR217	90.667	13	37.667	17.667	51.667	24.333	46.667	23.333	-0.137484	0.03599	0.0283731	-2.79674	1.49e-25	6.31e-26	-1.09224	0.000288233	0.000150121	0.904403	0.0298875	0.0210432	-2.3542	5.62e-13	3.04e-13	0.401315	0.704691	0.660184	0.939489	3.42e-08	1.61e-08	-1.13751	0.00936101	0.00649231	-1.26195	0.00500357	0.00379852	-0.0605424	0.373006	0.316073	0.309102	0.551922	0.439813	0.442545	0.0176681	0.0107107	-1.07697	0.000124209	7.78e-05	-0.815367
novel-ahy-miR92-3p	novel-ahy-miR92	92	63.333	98	77.333	119.333	52	94.667	150	-0.34646	0.14094	0.115586	-0.51762	0.220366	0.178338	-0.360475	0.396941	0.312178	-0.293714	0.000700927	0.000436292	-0.248271	2.87e-10	1.63e-10	0.964934	8.57e-09	3.43e-09	0.853144	6.77e-14	2.58e-14	0.328394	2.54e-20	1.16e-20	0.112204	1.37e-14	7.25e-15	1.528	5.45e-48	1.52e-48	-0.0703945	0.0985931	0.0682963	0.269349	2.36e-05	1.16e-05	-1.1996	3.35e-11	1.62e-11	0.388269
novel-ahy-miR71-5p	novel-ahy-miR71	96.667	72	103.333	74.667	66.667	102	104	76	0.636912	3.97e-19	2.06e-19	-0.399931	0.028954	0.0213423	-0.45943	0.064387	0.0425893	0.497783	0.0761621	0.0575101	-0.347457	9.01e-08	5.63e-08	0.0255287	0.0767254	0.0537078	0.0281052	0.0635714	0.0439102	0.189027	1.33e-08	7.59e-09	0.111973	1.99e-15	1.01e-15	-0.41978	0.383626	0.327091	0.0139842	0.23354	0.167857	0.0524739	0.00952141	0.00562405	0.608807	2.37e-12	1.11e-12	-0.510955
novel-ahy-miR123-5p	novel-ahy-miR123	97.667	97	91	111.667	42.667	57.333	98.333	86	1.20455	6.69e-32	2.94e-32	-0.0199634	3.31e-09	1.78e-09	0.290943	2.85e-05	1.37e-05	-0.747059	1.61e-13	6.75e-14	0.198825	3.27e-28	1.41e-28	-0.37807	5.33e-08	2.27e-08	0.786714	1.1e-12	4.27e-13	1.00562	6.27e-27	2.7e-27	-0.0921182	1.54e-09	8.94e-10	0.587778	5.63e-10	2.52e-10	0.111809	0.704369	0.638335	0.218788	8.43e-06	4.06e-06	0.417841	1.89e-05	1.14e-05	-1.18486
novel-ahy-miR18-3p	novel-ahy-miR18	99	51.667	55	54	60.667	62.667	66.667	53	0.128815	1.46e-05	9.64e-06	-0.938185	0.138025	0.107432	-0.0353964	0.315866	0.238544	0.270753	0.936229	0.912346	-0.883393	0.229787	0.202261	-0.0180429	0.0732257	0.0508726	0.0897306	0.0631246	0.0439269	-0.19492	0.0104609	0.00748009	-0.847997	0.904705	0.895232	-0.234004	0.724384	0.697696	0.270295	0.576897	0.471733	0.0547921	0.0245647	0.0155279	0.0390842	0.0252275	0.0180576	-0.706517
novel-ahy-miR222-3p	novel-ahy-miR222	100	144.333	86	66.667	24.667	81	75.333	101.333	1.6107	1.96e-32	8.52e-33	0.519371	1.22e-31	4.92e-32	-0.37461	0.333943	0.257414	-0.823377	9.89e-22	3.53e-22	-0.592201	0.000389515	0.000271849	0.611305	0.0236893	0.0143383	-0.10464	0.511624	0.44833	2.03845	1.33e-57	4.37e-58	-0.217591	5.06e-07	3.18e-07	0.32311	8.49e-07	4.11e-07	-0.191055	0.010098	0.00610086	-1.11157	7.86e-11	3.14e-11	1.71534	3.32e-30	1.17e-30	-2.01935
novel-ahy-miR1-5p	novel-ahy-miR1	108.667	201.333	99.667	111.667	149.667	166	146	141.667	-0.0327221	1.1e-06	7.09e-07	0.898552	3.77e-63	1.07e-63	0.165059	0.0017476	0.00095572	-0.2784	1.18e-09	5.36e-10	0.0395284	4.39e-23	2.01e-23	0.351944	0.650729	0.589081	-0.191821	0.855664	0.829201	-0.0695807	7.15e-08	4.15e-08	-0.125531	7.9e-10	4.47e-10	-0.22868	0.489714	0.440742	0.553862	0.000703329	0.000362654	-0.859024	1.09e-07	4.86e-08	0.159099	1.92e-06	1.07e-06	0.461053
novel-ahy-miR76-3p	novel-ahy-miR76	112.667	60.667	74	37	89.667	51.333	158	74.667	0.810436	5.3e-35	2.22e-35	-0.888184	0.209453	0.168426	-1	2.99e-06	1.35e-06	-0.233061	0.00221408	0.00141204	-1.59361	0.000111707	7.56e-05	1.01295	1.55e-05	7.43e-06	1.60974	1.49e-48	3.45e-49	-0.258722	0.0105079	0.00745719	-0.593606	0.0771687	0.0638359	0.540584	3.62e-08	1.68e-08	1.0821	8.89e-16	2.87e-16	-0.705422	0.0364169	0.023586	-0.799307	0.000732509	0.000481914	-0.321938
novel-ahy-miR4-5p	novel-ahy-miR4	119.333	67.333	90.667	26	157	74	105.333	37	-0.586506	0.591994	0.538745	-0.812477	0.430268	0.377039	-1.81534	1.61e-20	5.18e-21	0.143364	0.443671	0.371235	-2.19672	8.18e-14	4.39e-14	0.527611	0.360321	0.292049	0.495598	2.46e-08	1.13e-08	-2.0821	4.4e-28	1.87e-28	-0.381385	0.000183168	0.000125629	-1	3.32e-05	1.71e-05	0.207871	0.747508	0.689109	-1.38425	1.95e-08	8.4e-09	-1.0821	1.26e-11	6.03e-12	0.412992
novel-ahy-miR144-3p	novel-ahy-miR144	121.667	245.667	109.667	120.667	74	113.333	229.667	85.667	1.6365	4.79e-97	1.24e-97	1.01581	4.1e-85	9.94e-86	0.137902	0.00234936	0.00132152	-1.11025	3.77e-51	9.23e-52	-0.00397587	4.68e-23	2.17e-23	-0.49422	5.52e-11	2.06e-11	1.00847	2.56e-39	6.59e-40	0.224277	6.36e-10	3.38e-10	-0.141878	4.18e-10	2.34e-10	-0.403757	0.442509	0.388943	1.0559	2.54e-21	7.27e-22	-1.01979	1.52e-14	5.9e-15	0.628034	1.27e-13	5.88e-14	-0.722473
ahy-miR398	ahy-MIR398	133.667	73.667	108.333	71.667	23	60.667	97.333	82	2.07139	3.61e-52	1.3e-52	-0.852336	0.267615	0.222093	-0.609582	0.0040341	0.0023112	-0.296056	0.000280475	0.000165995	-0.905535	0.234431	0.207569	0.207805	0.552222	0.491187	0.688061	8.97e-11	3.75e-11	1.83399	5.31e-43	2e-43	-0.295953	8.57e-07	5.43e-07	0.450661	2.95e-07	1.4e-07	-0.164377	0.00908434	0.00539383	-0.0531995	0.0551595	0.0368683	1.38333	1.64e-18	6.83e-19	-2.53172
novel-ahy-miR76-5p	novel-ahy-miR76	135.667	106	143	82	129	89	171.667	101.667	0.401893	9.39e-22	4.82e-22	-0.352449	0.00101949	0.00064638	-0.792195	4.4e-07	1.97e-07	-0.257595	2.97e-05	1.67e-05	-0.722818	0.00544871	0.00417167	0.300659	0.871753	0.848812	0.939066	3.95e-27	1.16e-27	-0.349287	0.0204607	0.0148505	0.0693773	4.18e-20	1.9e-20	0.187886	7.86e-05	4.14e-05	0.259644	0.408523	0.312775	-0.370368	0.779176	0.722656	-0.537173	0.0596483	0.0439514	-0.0728716
novel-ahy-miR123-3p	novel-ahy-miR123	139.333	180	159.667	88	74.667	106.667	186	49.333	1.31676	2.96e-64	9.55e-65	0.36946	1.1e-31	4.37e-32	-0.859491	5.69e-09	2.34e-09	-0.754883	7.75e-24	2.53e-24	-0.662962	0.000613017	0.000431028	-0.834951	2.85e-14	9.3e-15	0.802189	8.87e-24	2.79e-24	-0.597918	0.942386	0.942386	0.196529	4.04e-27	1.67e-27	-1.11249	9.09e-09	4.16e-09	0.220236	0.653811	0.565274	-1.03242	4.07e-11	1.6e-11	0.514571	8.02e-11	3.93e-11	-0.899994
novel-ahy-miR136-5p	novel-ahy-miR136	146.667	73.667	72.667	129	65.667	85.667	98	103.667	0.565212	1.2e-16	6.6e-17	-0.980272	0.0212785	0.015246	0.830916	8.43e-18	2.81e-18	0.217721	0.785088	0.741027	-0.17572	2e-18	9.92e-19	-0.320998	8.18e-08	3.57e-08	0.174284	0.00202504	0.00114822	0.656761	1.12e-22	4.98e-23	-1.00664	0.127416	0.107403	0.265833	3.76e-06	1.86e-06	0.418369	0.0628148	0.0402407	0.804552	4.09e-21	1.31e-21	0.390928	6.51e-07	3.56e-07	-1.15348
novel-ahy-miR127-3p	novel-ahy-miR127	152.333	207	114.667	95	27	50.667	73.667	10.333	1.4415	8.72e-29	3.97e-29	0.438573	4.85e-40	1.7e-40	-0.271451	0.695599	0.619518	-2.02353	6.26e-86	1.18e-86	-0.678072	0.000667813	0.000476512	-3.20067	3.08e-61	5.67e-62	0.533416	1.49e-06	7.3e-07	-1.3857	0.0093269	0.00641851	-0.406621	4.21e-05	2.8e-05	-2.29379	1.36e-15	5.02e-16	-0.644916	1.34e-10	4.89e-11	-1.11664	2.56e-15	9.53e-16	0.908087	6.26e-10	3.16e-10	-2.49304
novel-ahy-miR127-5p	novel-ahy-miR127	153	146.333	89.667	77.667	24.333	18.333	40	25.333	0.705025	6.79e-09	4.2e-09	-0.0645544	1.11e-11	5.7e-12	-0.213493	0.961649	0.95664	-2.99016	8.72e-88	1.6e-88	-0.978072	0.582707	0.543253	-1.61007	1.46e-26	4e-27	1.1135	8.93e-09	3.91e-09	0.0581037	0.00641341	0.00434457	-0.764579	0.609305	0.577404	0.466575	0.0041723	0.00239358	-1.17664	6.19e-18	1.84e-18	-0.913518	5.5e-07	2.48e-07	-0.408471	0.733548	0.691079	-2.64624
novel-ahy-miR85-3p	novel-ahy-miR85	160.667	182.333	252.667	167.667	164.333	254.667	345.667	372.667	1.06732	8.55e-97	2.26e-97	0.191893	7.82e-24	3.35e-24	-0.597442	8.89e-06	4.17e-06	0.475199	0.00894651	0.00584262	0.0620293	4.9e-35	1.97e-35	1.14694	9.11e-31	2.35e-31	0.441874	8.83e-21	2.96e-21	1.16731	1.93e-128	4.35e-129	0.659471	7.19e-74	2.22e-74	0.541873	1.52e-36	4.71e-37	0.449495	7.3e-05	3.46e-05	-0.129864	0.0314379	0.0201984	0.625442	7.98e-30	2.86e-30	0.0416507
ahy-miR160-5p	ahy-MIR160	162	426	774	1193	428.333	572	1187	1573	1.46016	0	0	1.37554	9.7e-191	1.9e-191	0.613	1.62e-107	2.7e-108	0.426718	0.00303623	0.00195186	2.84047	0	0	0.40276	0.000753313	0.00040441	1.04029	2.24e-206	2.66e-207	1.86085	0	0	2.22747	0	0	1.44098	0	0	0.615071	1.64e-31	4.09e-32	1.46493	0	0	0.41987	2.48e-42	7.84e-43	1.38239
novel-ahy-miR190-5p	novel-ahy-miR190	165	36.333	15	4	3.667	2.667	0.667	3.333	-2.45884	0.0466281	0.0372532	-2.17727	2.49e-28	1.03e-28	-1.90689	0.000121673	6.21e-05	-3.76799	1.79e-26	5.66e-27	-5.36048	1.08e-81	3.55e-82	-0.263179	0.443719	0.371322	-1.99946	0.108357	0.0781957	-0.137779	0.503655	0.449498	-3.45359	1.3e-57	4.3e-58	0.321603	0.413681	0.359249	-4.49113	5.52e-12	1.9e-12	-3.18321	8.48e-17	3.03e-17	-0.459382	0.845067	0.81838	-5.48588
novel-ahy-miR113-5p	novel-ahy-miR113	175.667	7	6.333	5.667	3.333	12.667	7	2.333	1.07053	0.00405143	0.00291532	-4.63282	5.66e-89	1.31e-89	-0.160304	0.940231	0.910849	0.855648	0.152778	0.120819	-4.93759	4.39e-82	1.4e-82	-1.2804	0.0188315	0.0110015	-0.855648	0.123786	0.0899685	-0.514635	0.897485	0.89266	-4.77729	5.14e-87	1.53e-87	-2.44082	4.19e-05	2.19e-05	0.144466	0.967591	0.957512	-0.30477	0.971961	0.961889	1.92618	2.24e-06	1.26e-06	-5.70336
novel-ahy-miR73-5p	novel-ahy-miR73	207.667	26	32.333	22.333	7.333	8.333	5.333	7.333	-0.459456	0.909677	0.909677	-2.98606	3.75e-63	1.04e-63	-0.53383	0.221322	0.159075	-1.70044	1.18e-09	5.29e-10	-3.2054	3.28e-55	1.18e-55	-1.6067	1.97e-08	8.2e-09	-0.585053	0.410056	0.336077	0	0.189737	0.157094	-2.67157	2.1e-47	7.49e-48	-0.125596	0.801025	0.779946	-2.59999	5.08e-17	1.54e-17	-0.219335	0.735796	0.651923	0.125596	0.287623	0.242209	-4.8121
novel-ahy-miR56-3p	novel-ahy-miR56	208.333	268.667	254	93.667	207.333	69.667	213.667	298.667	0.0322684	8.9e-12	5.18e-12	0.359712	2.13e-46	7.13e-47	-1.41955	1.14e-37	2.9e-38	-1.93074	3.05e-106	4.82e-107	-1.14219	0.290269	0.260032	1.66188	6.72e-52	1.45e-52	1.60563	5.82e-65	1.23e-65	0.517368	7.02e-53	2.45e-53	0.277361	2.85e-48	1e-48	2.09073	2.1e-132	3.64e-133	-0.242762	1.42e-07	5.85e-08	-1.5019	6.25e-37	1.68e-37	-1.57336	8.77e-32	3.05e-32	0.00233024
novel-ahy-miR83-3p	novel-ahy-miR83	210	175	145.667	148.667	110.667	234.667	263.333	279	1.24655	6.02e-86	1.72e-86	-0.266712	1.05e-07	5.86e-08	0.0262349	0.019632	0.0119633	0.423303	0.0669122	0.0498428	-0.500203	3.39e-10	1.94e-10	0.909488	1.27e-13	4.4e-14	0.161659	1.29e-06	6.24e-07	1.33758	1.08e-107	2.73e-108	-0.526437	0.000737848	0.000525379	0.252695	1.48e-13	5.91e-14	0.844687	1.09e-15	3.57e-16	-0.23349	0.390858	0.319977	1.08489	1.43e-50	4.21e-51	-0.928296
ahy-miR167-3p	ahy-MIR167	212.333	10.667	12.667	6.667	2.667	11	29	3	3.44276	2.15e-23	1.06e-23	-4.30145	6.83e-101	1.48e-101	-0.925965	0.096928	0.066638	0.044349	0.605424	0.543646	-4.97949	1.73e-99	4.86e-100	-1.15208	0.0166139	0.00961855	1.39855	1.85e-08	8.29e-09	0.169745	0.305326	0.261004	-4.05353	3.5e-90	1.03e-90	-1.87447	0.00236818	0.00133366	1.19498	0.000275186	0.000134727	-0.678045	0.465059	0.385541	2.04421	5.55e-06	3.19e-06	-6.30131
novel-ahy-miR64-3p	novel-ahy-miR64	213.333	141.333	180	104.333	108	119.667	165.333	129	0.621941	1.64e-28	7.55e-29	-0.603259	0.20164	0.161104	-0.776078	2.81e-08	1.21e-08	-0.235685	2.17e-06	1.15e-06	-1.0206	0.911046	0.892066	0.302447	0.876866	0.858406	0.476699	3.04e-11	1.25e-11	0.266031	1.5e-15	7.18e-16	-0.244523	2.37e-12	1.26e-12	0.12079	0.000187004	9.94e-05	-0.117722	0.00214236	0.00114929	-0.417341	0.369738	0.298856	0.145242	5.96e-05	3.64e-05	-0.984186
novel-ahy-miR9-3p	novel-ahy-miR9	219.667	178	69.333	26.667	82.667	66	74.667	26.333	-0.160452	0.00744891	0.00555712	-0.300579	9.21e-07	5.22e-07	-1.37849	2.14e-10	8.58e-11	-1.42321	3.35e-50	8.37e-51	-3.0312	1.5e-52	5.61e-53	-0.0181836	0.239736	0.181695	0.158552	0.0102731	0.00630154	-1.6446	1.82e-09	1.01e-09	-1.65271	2.03e-15	1.04e-15	-1.32559	3.91e-08	1.83e-08	0.0874763	0.719895	0.656154	-2.73062	1.7e-64	3.61e-65	-0.319005	0.905077	0.895549	-1.40479
novel-ahy-miR32-3p	novel-ahy-miR32	227.667	144.667	98.667	71	236	111	70.333	48	-1.73834	1e-32	4.24e-33	-0.635284	0.513391	0.463111	-0.469857	0.0641764	0.0427843	-0.375509	1.56e-09	7.17e-10	-1.65546	5.45e-10	3.15e-10	-0.564785	7.14e-08	3.08e-08	-0.658286	0.000544677	0.000297607	-2.28951	3.95e-50	1.4e-50	-1.1856	9.92e-05	6.65e-05	-1.20945	9.33e-11	4.08e-11	-0.483474	8.14e-07	3.48e-07	-1.02018	4.68e-09	1.99e-09	-1.08006	5.9e-17	2.61e-17	0.0692626
novel-ahy-miR124-3p	novel-ahy-miR124	228.333	642	412.333	490.667	98.667	95	153	224.667	0.617087	3.67e-27	1.73e-27	1.48452	3.96e-303	6.93e-304	0.245884	1.42e-16	4.88e-17	-2.74203	0	0	1.09954	1.73e-259	3.6e-260	-1.11663	1.01e-105	1.49e-106	0.676793	2.11e-16	7.71e-17	1.18071	2.07e-78	6.23e-79	0.853654	2.37e-143	6.08e-144	1.24042	3.36e-56	8.3e-57	-1.43437	5.55e-102	7.52e-103	-0.38498	0.278984	0.221163	-0.059706	0.0472748	0.0345852	-1.19781
ahy-miR3513-5p	ahy-MIR3513	230.667	212.333	214.333	172.333	454	519.667	578	264.667	0.349975	6.23e-62	2.04e-62	-0.11757	3.57e-14	1.75e-14	-0.312956	0.315701	0.236776	1.28703	8.53e-57	2.05e-57	-0.419225	2.12e-14	1.13e-14	0.618129	7.09e-05	3.58e-05	0.154141	2.25e-12	8.92e-13	-0.774722	0.00950915	0.00664618	-0.10627	1.78e-20	8.02e-21	-0.970555	1.03e-27	3.37e-28	1.42987	2.66e-89	4.16e-90	-0.301656	0.808948	0.758651	0.195834	1.15e-20	4.66e-21	0.973626
novel-ahy-miR42-3p	novel-ahy-miR42	236.667	137.667	152.667	75.667	66.333	101.333	110.333	68	0.744263	1.17e-22	5.9e-23	-0.781996	0.508848	0.45639	-1.00949	5.18e-12	1.97e-12	-0.445869	1.77e-10	7.87e-11	-1.63492	1.9e-09	1.13e-09	-0.15413	0.00266275	0.00148553	0.132707	0.00686999	0.00410783	0.0503662	9.53e-06	5.79e-06	-0.625432	0.0230564	0.0181071	-0.56119	0.0471864	0.0337755	-0.469725	1.82e-09	6.9e-10	-0.852929	8.29e-06	3.95e-06	0.611556	3.08e-12	1.46e-12	-1.83942
novel-ahy-miR50-5p	novel-ahy-miR50	238.667	331.333	235.667	309.667	159	243.333	255	208	0.666638	3.48e-47	1.27e-47	0.473768	7.89e-66	2.12e-66	0.393785	5.61e-17	1.9e-17	-0.453592	1.2e-23	4.04e-24	0.37538	4.01e-93	1.15e-93	-0.566289	6.97e-31	1.76e-31	0.0665657	0.000466954	0.000247919	0.388988	2.17e-30	9e-31	-0.0184046	5.52e-27	2.31e-27	-0.211085	0.388401	0.335252	0.105146	0.575757	0.464804	-0.098388	0.000844175	0.00046364	0.600072	1.08e-27	4.04e-28	-0.579897
novel-ahy-miR206-5p	novel-ahy-miR206	262	333.333	298.667	659.667	227.333	201.667	283.667	554.667	0.318529	1.79e-29	8.04e-30	0.350825	1.38e-55	4.26e-56	1.13398	8.27e-130	1.25e-130	-0.7216	4.96e-41	1.34e-41	1.32893	0	0	-0.244622	9.69e-29	2.6e-29	0.48952	1.34e-19	4.57e-20	1.28409	8.6e-206	1.71e-206	0.194954	6.39e-49	2.21e-49	1.45508	9.49e-165	1.35e-165	-0.0762089	0.000818043	0.000426064	0.978107	1.41e-128	2.12e-129	-0.170991	0.121819	0.0948902	-0.199784
novel-ahy-miR77-5p	novel-ahy-miR77	265.333	284.667	243.333	232.667	84.333	280	265	254	1.64637	6.64e-113	1.65e-113	0.0986807	3.03e-31	1.23e-31	-0.0607113	0.0740529	0.0497543	-0.0205858	7.87e-05	4.57e-05	-0.18045	7.76e-32	3.23e-32	0.118971	0.0514351	0.0335682	-0.076274	0.107198	0.0768065	1.58307	7.58e-115	1.83e-115	-0.119739	4.62e-22	1.96e-22	-0.139575	0.03572	0.025004	0.12156	0.628261	0.536639	-0.279131	0.70899	0.620825	1.72264	5.51e-102	1.25e-102	-1.64455
novel-ahy-miR74-5p	novel-ahy-miR74	302.333	94	181.667	51.667	39	197.667	205.333	43	2.37993	6.07e-122	1.41e-122	-1.6861	5.62e-27	2.34e-27	-1.81537	2.98e-40	7.29e-41	1.06301	1.99e-15	7.92e-16	-2.5486	9.06e-49	3.44e-49	-0.25555	0.00229602	0.00126885	0.0580056	0.00290079	0.00167468	0.140863	6.04e-05	3.83e-05	-0.73323	0.23493	0.20541	-2.18107	9.92e-54	2.51e-54	0.168147	0.944558	0.92488	-0.862501	0.00025782	0.000137593	2.32193	1.92e-98	4.45e-99	-2.94502
novel-ahy-miR11-5p	novel-ahy-miR11	307	60.667	71.333	27.667	13.333	42.667	21.667	25	0.700498	2.82e-05	1.88e-05	-2.32825	1.97e-59	5.7e-60	-1.3664	1.68e-10	6.65e-11	-0.507791	5.61e-06	3.06e-06	-3.461	3.19e-92	9.31e-93	-0.146238	0.082188	0.0588293	-0.977621	0.00054695	0.000296029	0.906927	4.72e-08	2.72e-08	-2.09459	9.04e-41	3.41e-41	-0.771193	0.0324971	0.0224059	-1.71907	3.15e-23	8.54e-24	-1.13275	2.31e-05	1.13e-05	1.67812	3.45e-16	1.54e-16	-4.51416
novel-ahy-miR44-3p	novel-ahy-miR44	326	94.333	104	49.667	164.667	160.667	148.333	67	-0.148416	0.000160954	0.000109006	-1.76674	5.29e-34	2.04e-34	-1.06622	2.03e-09	8.24e-10	0.762237	3.19e-06	1.71e-06	-2.69221	8.25e-61	2.92e-61	0.431873	0.423906	0.348049	-0.115724	0.41234	0.340075	-1.28853	2.47e-09	1.38e-09	-1.62599	1.53e-21	6.72e-22	-1.25584	2.33e-16	8.47e-17	0.505764	0.00214574	0.00113992	-0.925475	4.9e-05	2.49e-05	-0.0326916	0.00465233	0.00320766	-0.97181
novel-ahy-miR62-5p	novel-ahy-miR62	327.333	209	79.333	55.667	398.667	195.333	116	44	-1.76773	1.37e-56	4.7e-57	-0.637262	0.383674	0.328298	-0.528489	0.0604529	0.0396722	-0.0932636	2.56e-05	1.43e-05	-2.55403	4.94e-53	1.83e-53	-0.321928	0.000342061	0.000178232	-0.746884	2.63e-08	1.22e-08	-3.16628	1.22e-141	2.69e-142	-2.02554	2.72e-40	1.06e-40	-2.14543	2.86e-51	7.38e-52	0.548132	0.00293513	0.00158986	-1.91677	7.38e-44	1.83e-44	-1.02084	2.37e-24	9.24e-25	0.290318
novel-ahy-miR22-3p	novel-ahy-miR22	327.333	432.667	531.667	559.333	123	410.667	577	436.667	2.2086	0	0	0.39865	1.15e-77	2.84e-78	0.0710467	2.67e-08	1.14e-08	-0.0785032	8.56e-09	4.11e-09	0.755215	1.27e-237	2.77e-238	-0.342033	1.58e-33	3.74e-34	0.484241	2.17e-38	5.7e-39	1.8174	8.73e-222	1.69e-222	0.684168	6.55e-161	1.61e-161	0.0930353	1.86e-11	7.94e-12	0.12022	0.409139	0.311116	0.356565	4.3e-39	1.11e-39	1.72436	1.26e-149	2.31e-150	-1.40421
novel-ahy-miR158-3p	novel-ahy-miR158	331.333	367.333	258.667	370	405.333	366.667	273	494	-0.569986	0.420798	0.367363	0.151118	9.38e-44	3.24e-44	0.520204	3.03e-27	8.51e-28	0	2.99e-05	1.69e-05	0.169598	2.67e-86	8.2e-87	0.409451	0.0345992	0.0218521	-0.428384	0.00156304	0.000878202	0.286329	8.62e-59	2.74e-59	-0.350606	4.23e-12	2.3e-12	0.427932	2.7e-37	8.09e-38	0.0733402	0.283304	0.208051	0.0184807	7.59e-08	3.34e-08	-0.141603	0.00953753	0.00667627	0.29272
novel-ahy-miR134-3p	novel-ahy-miR134	359.667	370.667	198.333	130	60.667	50	152.667	16.333	1.3314	1.39e-53	4.94e-54	0.0318841	1.31e-35	4.88e-36	-0.608261	4.23e-05	2.07e-05	-2.87184	6.88e-214	8.43e-215	-1.46515	7.67e-08	4.75e-08	-2.98895	2.8e-79	4.87e-80	1.61039	1.45e-46	3.43e-47	-1.89312	1.14e-09	6.19e-10	-0.856888	0.709534	0.687245	-1.61414	5.18e-09	2.35e-09	-0.372684	2.36e-09	9.2e-10	-1.49703	6.72e-50	1.64e-50	-0.278984	0.883217	0.859974	-2.56098
novel-ahy-miR45-3p	novel-ahy-miR45	368.333	259.333	375	267.333	215	178.333	239.667	129.667	0.147714	1.19e-17	6.31e-18	-0.504599	0.00211254	0.00137206	-0.48387	6.87e-05	3.4e-05	-0.526142	4.46e-23	1.52e-23	-0.460261	3.18e-19	1.54e-19	-1.04246	3.48e-53	7.32e-54	0.408944	3.02e-14	1.12e-14	-0.733215	0.213483	0.180198	0.0236082	5.77e-46	2.09e-46	-0.471985	0.130157	0.0972754	-0.645405	1.74e-32	4.27e-33	0.0443373	6.41e-07	2.92e-07	-0.26123	0.702547	0.658176	-0.769511
novel-ahy-miR69-5p	novel-ahy-miR69	377	15.333	20.667	13.333	4.333	5	7.333	4	0.759037	0.0128593	0.00979753	-4.5993	1.95e-188	3.92e-189	-0.632328	0.208501	0.147688	-1.61664	4.21e-06	2.28e-06	-4.80094	2.14e-170	4.89e-171	-1.73693	6.95e-06	3.25e-06	0.552475	0.153047	0.112813	-0.115366	0.44237	0.387668	-4.16861	5.37e-164	1.29e-164	-0.321928	0.976251	0.971113	-1.49485	1.64e-06	7.08e-07	-0.201639	0.769656	0.685911	0.206562	0.398126	0.345741	-6.4225
ahy-miR3516	ahy-MIR3516	412.333	178.333	147.667	71.667	298.667	175.333	157.333	126.667	-0.924548	3.22e-07	2.06e-07	-1.2034	5.73e-12	2.9e-12	-1.04971	2.39e-12	8.96e-13	-0.0299666	0.00193608	0.00122486	-2.52533	2.03e-64	6.98e-65	0.828399	1.82e-05	8.83e-06	-0.153843	0.642265	0.589295	-1.23427	1.07e-13	5.16e-14	-1.47562	1.66e-18	7.76e-19	-0.463566	0.111537	0.0821848	0.0884171	0.527944	0.417955	-1.32193	1.1e-18	3.65e-19	-0.770705	5.27e-09	2.78e-09	-0.462657
novel-ahy-miR186-5p	novel-ahy-miR186	425.667	330.333	340.667	172.667	101	212.667	189.667	185.667	0.908795	5.03e-46	1.89e-46	-0.355414	8.01e-09	4.37e-09	-0.980293	1.15e-23	3.54e-24	-0.633218	7.08e-35	2.06e-35	-1.29255	0.000296819	0.000205609	0.105117	0.0571729	0.0382156	-0.167942	0.671222	0.626243	0.877934	5.19e-50	1.87e-50	-0.312259	1.6e-17	7.54e-18	-0.198803	0.254545	0.203636	-0.844316	3.13e-42	6.53e-43	-0.937139	2.97e-15	1.12e-15	1.07674	1.82e-45	5.55e-46	-2.06537
novel-ahy-miR84-3p	novel-ahy-miR84	489.333	113.667	120.667	51.333	24.333	66.333	53	23.667	1.12308	9.32e-17	5.03e-17	-2.09146	6.93e-75	1.75e-75	-1.22907	4.3e-14	1.55e-14	-0.78003	4.73e-16	1.86e-16	-3.23406	1.29e-130	3.43e-131	-1.11701	4.89e-12	1.75e-12	-0.316474	0.504146	0.439179	-0.0400374	0.0229772	0.0168006	-2.00499	1.29e-57	4.34e-58	-1.47959	4.87e-10	2.15e-10	-1.18297	2.63e-24	6.98e-25	-1.14261	2.51e-09	1.05e-09	1.43955	7.46e-21	2.98e-21	-4.31104
ahy-miR167-5p	ahy-MIR167	533	180	464.333	145	191.667	357	348.333	137.333	0.860234	3.66e-79	1.07e-79	-1.55065	1.63e-37	5.98e-38	-1.67392	8.27e-89	1.59e-89	0.983846	2.13e-22	7.4e-23	-1.85992	9.22e-34	3.79e-34	-0.0783746	0.000424345	0.000223339	-0.0328522	0.0106976	0.00661707	-0.478407	0.194802	0.162335	-0.186002	7.62e-34	2.99e-34	-1.37149	8.57e-42	2.44e-42	-0.413655	9.87e-23	2.73e-23	-0.309273	0.906291	0.868724	0.893086	3.35e-61	9.34e-62	-1.45989
novel-ahy-miR135-5p	novel-ahy-miR135	535.333	406.667	428	354.667	259.333	364	297.333	398	0.198706	9.23e-24	4.49e-24	-0.399376	4.28e-09	2.32e-09	-0.269854	0.420971	0.339847	-0.156803	4.78e-12	2.07e-12	-0.589966	3.19e-16	1.63e-16	0.154187	0.0686531	0.0469731	-0.285654	0.235464	0.183273	0.60476	6.2e-79	1.83e-79	-0.320111	1.49e-21	6.47e-22	0.1204	2.04e-12	8.49e-13	-0.521722	2.99e-28	7.78e-29	-0.19059	0.0473335	0.0311469	0.48436	4.4e-32	1.51e-32	-1.04054
novel-ahy-miR27-3p	novel-ahy-miR27	568.333	1025	1197.33	1362.33	1882	754.667	1103.33	1466.33	-0.759537	9.5e-17	5.18e-17	0.84857	1.17e-304	1.99e-305	0.179946	1.55e-33	4.12e-34	-0.435902	9.19e-70	1.97e-70	1.25173	0	0	0.105909	1.8e-08	7.39e-09	0.541416	9.94e-83	1.85e-83	-0.355986	6.87e-18	3.18e-18	1.07178	0	0	0.944967	1.52e-264	1.91e-265	-0.117697	4.53e-16	1.44e-16	0.403157	7.79e-103	1.45e-103	-1.30095	1.39e-193	2.42e-194	1.71362
novel-ahy-miR67-5p	novel-ahy-miR67	619.333	14.667	15.333	7	18.333	12	9.333	3.333	-0.947584	0.183262	0.153203	-5.38367	0	0	-1.13121	0.019369	0.0121056	-0.289539	0.113325	0.0878845	-6.45082	0	0	-1.07053	0.0188953	0.0111383	-0.362622	0.707947	0.664157	-2.4331	1.44e-05	8.93e-06	-5.3196	0	0	-1.84814	0.00167199	0.000932795	-0.716227	0.0151469	0.00930904	-1.06715	0.065115	0.044872	-0.584963	0.37072	0.318039	-5.08825
novel-ahy-miR88-5p	novel-ahy-miR88	629.333	643.667	620	338	201	1307	656	839.667	1.69841	5.64e-286	1.1e-286	0.0350053	2.8e-59	8.23e-60	-0.868109	9.69e-33	2.62e-33	1.01644	7.45e-85	1.48e-85	-0.886715	0.00699584	0.00539263	1.29925	1.42e-89	2.17e-90	-0.988157	7.15e-92	1.25e-92	2.04765	0	0	-0.0186057	3.34e-68	1.05e-68	-0.638917	5.01e-20	1.74e-20	0.0818986	0.090903	0.0610755	-0.92172	5.4e-28	1.62e-28	2.68657	0	0	-1.63512
novel-ahy-miR217-3p	novel-ahy-miR217	630	261	417.667	267.667	494.667	610.333	354	423.667	-0.476995	0.654534	0.602587	-1.26427	1.55e-21	6.79e-22	-0.641685	7.57e-11	2.96e-11	1.21787	9.86e-60	2.26e-60	-1.22394	0.00100264	0.000720651	0.654377	1.08e-08	4.37e-09	-0.776126	6.63e-26	2.02e-26	-0.224031	2.98e-12	1.49e-12	-0.582255	4.92e-06	3.2e-06	-0.523162	3.09e-05	1.58e-05	-0.240272	3.28e-11	1.14e-11	0.0403302	1.04e-06	4.78e-07	0.299131	1.24e-33	4.17e-34	-0.345532
novel-ahy-miR17-3p	novel-ahy-miR17	630.333	330	195	214.333	627.667	533.333	228.333	390.667	-1.45633	1.74e-55	6.08e-56	-0.923136	0.000112261	6.83e-05	0.134576	4.17e-05	2.02e-05	0.681002	1.37e-13	5.67e-14	-1.54226	1.59e-17	7.93e-18	0.850503	1.56e-16	4.92e-17	-1.22117	3.65e-58	7.91e-59	-0.684774	0.182345	0.149993	-1.67684	4.7e-44	1.75e-44	-0.449622	0.0118816	0.00737907	0.213528	0.574302	0.46662	-0.619123	7.86e-05	4.07e-05	-0.235152	0.176976	0.140649	-0.00698268
novel-ahy-miR86-5p	novel-ahy-miR86	680.667	488.333	184	220.333	170.667	193.667	267	168	0.625704	4.46e-47	1.65e-47	-0.46387	1.41e-06	8.09e-07	0.24903	2.5e-08	1.06e-08	-1.33195	1.96e-124	2.9e-125	-1.60317	1.96e-23	8.89e-24	-0.388887	3.77e-15	1.21e-15	0.460803	2.82e-17	1e-17	-0.031336	1.15e-10	5.92e-11	-1.8522	4.94e-66	1.58e-66	-0.196238	0.321326	0.268899	0.517183	6.94e-06	3.14e-06	-1.1393	3.29e-36	9.21e-37	0.164902	3.66e-08	1.94e-08	-1.96072
ahy-miR408-3p	ahy-MIR408	734.667	269.333	359.667	233.333	96	237.333	182	546.667	0.925203	7.55e-45	2.88e-45	-1.42351	8.5e-40	3.02e-40	-0.62779	7.13e-09	2.97e-09	-0.180932	4.12e-09	1.93e-09	-1.63314	3.09e-27	1.37e-27	1.2283	3.64e-51	8.05e-52	-0.383591	0.0439543	0.0296805	2.5084	0	0	-1.00535	0.000123715	8.42e-05	1.1996	5.64e-130	1.01e-130	-0.982687	1.72e-54	3.31e-55	-0.209625	0.142682	0.104978	1.30879	2.9e-63	7.64e-64	-2.91324
novel-ahy-miR62-3p	novel-ahy-miR62	746.667	455.667	389	294.667	544.667	579.667	539.333	348	-0.0152014	6.39e-23	3.18e-23	-0.701336	0.933414	0.918979	-0.403113	0.0060714	0.00354165	0.346105	0.123959	0.0973965	-1.32879	2.86e-08	1.74e-08	0.236591	0.545777	0.476837	-0.1082	0.0602104	0.0412783	-0.643968	0.551251	0.500868	-0.925675	0.0331206	0.0263577	-0.736966	1.24e-14	4.62e-15	0.462245	9.04e-08	3.67e-08	-0.627453	1.84e-06	8.69e-07	0.0929982	2.55e-15	1.17e-15	-0.448229
novel-ahy-miR64-5p	novel-ahy-miR64	749	330	549.333	453.667	345	366.333	487.667	527.333	0.500187	2.48e-68	7.75e-69	-1.17221	8.36e-19	3.83e-19	-0.270815	0.316341	0.240551	0.157137	0.103587	0.0792755	-0.706647	1.87e-11	1.04e-11	0.210488	0.247163	0.189925	0.409097	1.07e-26	3.2e-27	0.610004	2.48e-103	6.67e-104	-0.435832	8.63e-17	4.2e-17	0.518914	8.73e-49	2.34e-49	-0.170144	1.28e-10	4.61e-11	0.465564	4.54e-39	1.2e-39	0.0910892	5.35e-10	2.68e-10	-1.10616
novel-ahy-miR163-5p	novel-ahy-miR163	755	293	497	141	211	219.667	142	77	-0.562209	0.560672	0.507274	-1.35098	2.11e-33	8.26e-34	-1.79217	3.42e-108	5.52e-109	-0.428843	1.26e-19	4.62e-20	-2.39961	9.63e-105	2.66e-105	-0.872765	2.52e-23	7.28e-24	-0.609589	3.36e-06	1.68e-06	-1.44517	5.3e-16	2.51e-16	-0.607437	1.74e-06	1.11e-06	-1.49255	2.13e-31	6.84e-32	-1.78197	5.38e-164	6.45e-165	-1.04863	2.84e-18	9.56e-19	0.0473796	8.86e-06	5.13e-06	-1.8272
novel-ahy-miR78-5p	novel-ahy-miR78	833	668.333	351	350	173.667	352	406.333	317.333	1.21604	2.87e-129	6.54e-130	-0.296049	1.1e-20	4.86e-21	-0.00415563	0.00153153	0.000821602	-0.915111	1.16e-108	1.78e-109	-1.22496	3.92e-05	2.61e-05	-0.144317	7.55e-11	2.9e-11	0.202232	2.2e-11	8.97e-12	0.855687	1.13e-83	3.22e-84	-1.22081	9.54e-17	4.69e-17	-0.158121	0.02665	0.0178134	0.211881	0.582917	0.482728	-0.928916	2.42e-29	7.16e-30	1.01381	6.37e-70	1.61e-70	-2.22497
novel-ahy-miR93-5p	novel-ahy-miR93	1074.67	2250	1475.33	3649.67	2884.67	2026.33	6426.67	4070.67	1.08201	0	0	1.03363	0	0	1.24934	0	0	-0.153318	1.45e-58	3.39e-59	1.69822	0	0	0.15807	2.13e-11	7.86e-12	1.58942	0	0	0.468574	0	0	0.448889	0	0	0.975984	0	0	2.02084	0	0	0.664596	0	0	-0.50741	4.8e-17	2.07e-17	1.38772
novel-ahy-miR36-5p	novel-ahy-miR36	1108.67	662.667	1524	587.333	932.667	1006.33	1048	401	0.167052	1.95e-74	5.88e-75	-0.729564	0.580134	0.526308	-1.33896	7.84e-202	9.39e-203	0.604518	2.62e-16	1.01e-16	-0.901059	0.00194664	0.00142956	-0.54034	7.4e-55	1.48e-55	0.0486992	1.58e-12	6.17e-13	-1.198	7.53e-38	3e-38	0.437898	0	0	-1.31635	1.1e-106	2.27e-107	-0.514245	5.45e-101	7.67e-102	-0.171495	0.00202388	0.00112205	0.118353	6.49e-28	2.39e-28	-0.243399
novel-ahy-miR11-3p	novel-ahy-miR11	1119	705	697	515.333	493	533.333	647.667	475.667	0.389792	2.39e-75	7.09e-76	-0.650138	0.233336	0.191239	-0.43508	8.74e-06	4.05e-06	-0.404309	7.18e-44	1.83e-44	-1.09972	0.0899557	0.0735575	-0.124421	7.57e-14	2.55e-14	0.280214	4.2e-23	1.34e-23	-0.060121	1.51e-25	6.66e-26	-0.664644	0.000213875	0.000147809	-0.169699	0.014226	0.00898482	-0.109589	3.67e-09	1.45e-09	-0.449587	0.0149543	0.0089881	0.109578	1.17e-15	5.28e-16	-1.16402
novel-ahy-miR119-5p	novel-ahy-miR119	1134.67	1594.67	1852.67	2031.33	712	1328.67	1310.33	1718.33	0.866822	1.33e-299	2.53e-300	0.489379	0	0	0.123976	4.28e-38	1.07e-38	-0.252038	2.02e-64	4.42e-65	0.824382	0	0	-0.231506	1.85e-83	3.12e-84	-0.026683	2.2e-08	9.98e-09	1.24904	0	0	0.700406	0	0	0.355535	2.97e-109	5.94e-110	-0.489748	1.46e-110	1.9e-111	0.335003	2.6e-131	3.78e-132	0.893505	1.09e-224	1.84e-225	-0.656164
ahy-miR394	ahy-MIR394	1223.33	745.333	1115.67	958	816	1096.33	995.667	1010.33	0.287663	3.05e-93	8.4e-94	-0.714782	0.956526	0.946665	-0.216435	0.928096	0.879757	0.556288	9.98e-14	4.07e-14	-0.346691	3.77e-88	1.14e-88	0.0717917	4.86e-08	2.05e-08	-0.132432	0.0957783	0.0671435	0.30369	8.86e-124	2.05e-124	-0.130256	2.62e-94	7.53e-95	-0.116405	7.78e-07	3.73e-07	-0.16067	1.39e-19	4.07e-20	0.368092	1.12e-64	2.33e-65	0.420095	1.6e-81	3.96e-82	-0.578589
novel-ahy-miR96-3p	novel-ahy-miR96	1277	1603	1933.67	1143.33	1642	1727	2066.67	1037.67	0.337568	1.12e-210	2.31e-211	0.318964	3.49e-254	6.48e-255	-0.754683	1.59e-70	3.4e-71	0.105348	1.83e-07	9.24e-08	-0.160509	1e-159	2.35e-160	-0.13984	1.67e-32	4.05e-33	0.263836	1.87e-65	3.85e-66	-0.650929	0.120938	0.0975304	0.594174	0	0	-0.724661	5.59e-41	1.62e-41	0.0939734	0.00949366	0.00568631	-0.479473	1.07e-06	4.97e-07	0.0737319	9.98e-40	3.31e-40	0.35058
novel-ahy-miR18-5p	novel-ahy-miR18	1299	695.333	850.333	734.333	1349.67	777	962.667	992.333	-0.488664	0.529614	0.470768	-0.882283	1.68e-06	9.67e-07	-0.207513	0.963903	0.948842	0.171651	0.0281542	0.0196792	-0.793243	2.06e-09	1.23e-09	0.424967	0.000449734	0.000239069	0.282762	2.47e-37	6.61e-38	-0.42907	2.42e-06	1.43e-06	-0.58573	1.32e-09	7.55e-10	0.342356	1.08e-60	2.57e-61	0.157859	0.844716	0.791922	0.0890405	7.2e-20	2.35e-20	-0.771426	3.81e-40	1.24e-40	0.0607935
novel-ahy-miR61-5p	novel-ahy-miR61	1515	5	5	0.667	1.667	2	0.333	0	-2.32366	0.21421	0.181342	-8.16021	0	0	-2.90617	0.00349162	0.00198222	-1.32193	0.0239523	0.0166199	-11.0664	0	0	NA	NA	NA	-2.58641	0.0954028	0.067618	-10.703	0.114222	0.0908863	-8.16021	0	0	-10.9658	0.0474377	0.0337058	-3.90833	0.000172091	8.34e-05	-2.90617	0.00524906	0.00299169	0.262746	0.565671	0.512081	-9.74488
novel-ahy-miR63-5p	novel-ahy-miR63	1703	300.667	192.333	177.667	551.333	212.667	223.333	211.333	-1.29746	1.8e-36	7.25e-37	-2.47467	0	0	-0.128031	0.324524	0.248463	-0.501564	2.34e-24	7.52e-25	-3.24245	0	0	0.261668	0.707579	0.666614	0.0687633	0.000950162	0.000528956	-1.37078	2.6e-34	1.06e-34	-3.11442	0	0	-0.00455336	0.000525574	0.000284916	0.206953	0.6509	0.566147	-0.767785	5.18e-08	2.26e-08	-1.36622	6.6e-63	1.81e-63	-1.61001
novel-ahy-miR31-5p	novel-ahy-miR31	1753	868.667	3271.67	507.667	313.333	1666.67	1844.33	89.333	2.50205	0	0	-0.985273	7.51e-19	3.41e-19	-2.60312	0	0	0.911393	1.39e-88	2.48e-89	-1.75645	1.24e-88	3.67e-89	-2.48466	8.64e-263	9.55e-264	0.136005	1.92e-35	5.35e-36	-1.80119	3.41e-40	1.3e-40	0.846668	0	0	-4.16724	0	0	-0.784544	0	0	-0.771181	2.66e-22	8.42e-23	2.36604	0	0	-2.43992
novel-ahy-miR27-5p	novel-ahy-miR27	1795.67	1123.33	1613	753.333	2900	956	1631.33	935	-0.805057	1.83e-36	7.44e-37	-0.674386	0.229065	0.186558	-1.08814	9.17e-137	1.34e-137	-0.22854	3.7e-41	9.81e-42	-1.24298	7.57e-10	4.42e-10	0.312907	0.597758	0.537982	0.76938	2.02e-188	2.5e-189	-1.60159	2.13e-278	3.78e-279	-0.15484	2.04e-128	5.56e-129	-0.0271495	3.84e-12	1.62e-12	0.0212931	4.27e-07	1.8e-07	-0.568596	2.87e-10	1.19e-10	-1.57444	0	0	0.67151
novel-ahy-miR97-3p	novel-ahy-miR97	1832	271.333	370.667	148	182.333	106.667	153.667	108.333	-0.265668	0.0045107	0.00326966	-2.65216	0	0	-1.31603	1.1e-46	2.64e-47	-1.32912	1.49e-70	3.12e-71	-3.51858	0	0	-0.44924	4.84e-12	1.71e-12	0.507793	4.68e-12	1.88e-12	-0.76	0.180276	0.147322	-2.20255	3.78e-294	8.31e-295	0.0134622	0.00709435	0.00421927	-1.27094	7.93e-79	1.36e-79	-0.866417	1.03e-10	4.15e-11	-0.773462	4.78e-06	2.72e-06	-3.20782
ahy-miR3518	ahy-MIR3518	1833.33	2260.33	2015	1481.33	4624.33	2753.67	3789	3162.33	-0.272917	2.43e-35	1e-35	0.296856	0	0	-0.427583	1.31e-15	4.63e-16	0.280159	0.381586	0.317339	-0.295493	3.27e-151	8.18e-152	1.05609	8.47e-224	9.8e-225	0.437768	8.38e-227	9.5e-228	-0.5271	0.00199759	0.00131025	0.13209	6.57e-295	1.41e-295	0.183584	1.58e-118	2.99e-119	0.882693	1.05e-240	1.09e-241	-0.592349	2.32e-24	7.11e-25	-0.710685	5.23e-111	1.13e-111	1.2877
novel-ahy-miR26-5p	novel-ahy-miR26	1853.67	1585.67	1513.67	780.333	1899	1467	1921.67	1060	0.0127857	7.36e-87	2.06e-87	-0.221778	1.47e-68	3.86e-69	-0.948865	2.65e-95	4.69e-96	-0.111462	7.09e-35	2.1e-35	-1.23475	9.98e-10	5.87e-10	0.436127	0.000132206	6.75e-05	0.383229	9.15e-95	1.51e-95	-0.835822	1.12e-13	5.47e-14	-0.28588	1.02e-80	3.09e-81	-0.465379	1.04e-06	5.1e-07	0.335869	1.8e-09	6.94e-10	-1.01297	2.51e-86	5.07e-87	-0.370444	0.0312426	0.022692	0.0372038
novel-ahy-miR56-5p	novel-ahy-miR56	1905	1733.67	1874	359.333	1689.33	1011	1842.33	1447.67	0.128397	1.03e-115	2.51e-116	-0.160933	9.31e-101	2.06e-101	-2.35925	0	0	-0.744161	2.27e-226	2.54e-227	-2.38438	6.79e-258	1.45e-258	1.99395	0	0	0.861029	2.04e-247	2.21e-248	-0.217962	7.46e-39	2.89e-39	-0.0251275	2.2e-202	5.19e-203	0.51467	1.55e-129	2.86e-130	-0.0189381	4.1e-12	1.39e-12	-2.22344	0	0	-0.732631	3.4e-40	1.09e-40	-0.172463
ahy-miR156b-3p	ahy-MIR156b	1949.67	1950.67	979	477.333	1300.67	818	1118.67	482.667	-0.211957	3.42e-18	1.79e-18	-0.000501741	4.42e-164	9.11e-165	-1.031	5.96e-74	1.24e-74	-1.24348	0	0	-2.00957	4.04e-158	9.69e-159	0.0100737	9.98e-07	4.46e-07	0.456942	3.11e-66	6.25e-67	-1.42442	3.68e-87	1.03e-87	-0.978567	2.19e-07	1.37e-07	-0.75552	3.21e-22	1.1e-22	0.191531	0.605905	0.514388	-2.00907	0	0	-0.668899	9.9e-23	3.91e-23	-0.575078
novel-ahy-miR38-5p	novel-ahy-miR38	2068.33	901.333	2300	990	1020.33	1466.67	1067	583.333	0.0563992	8.07e-57	2.73e-57	-1.16299	1.54e-52	5e-53	-1.14943	2.05e-239	2.03e-240	0.69193	1.47e-36	4.05e-37	-1.03305	0.58443	0.541816	-0.740796	3.41e-133	4.84e-134	-0.447398	6.58e-14	2.48e-14	-0.79899	3.94e-06	2.35e-06	0.116378	0	0	-1.30279	1.75e-155	2.77e-156	-1.03484	0	0	0.129938	3.11e-33	8.87e-34	0.503798	2.22e-134	4.32e-135	-0.974859
novel-ahy-miR89-5p	novel-ahy-miR89	2290.33	92.667	97.333	62.333	60.333	129	94.333	44.667	0.634594	1.48e-17	7.93e-18	-4.57149	0	0	-0.637989	0.00233114	0.00129913	0.469765	0.0730037	0.0547527	-5.14355	0	0	-0.480787	4.51e-06	2.09e-06	-0.454279	0.0425668	0.0280853	-0.433738	0.324626	0.279248	-4.50556	0	0	-1.52261	2.34e-19	8.24e-20	-0.0504439	0.107865	0.0752805	-0.57206	0.0959184	0.0690811	1.08887	8.86e-29	3.22e-29	-5.1906
novel-ahy-miR60-3p	novel-ahy-miR60	2334.67	1564	1262.67	833.667	804.333	1223	1049.67	786	0.369273	4.72e-119	1.12e-119	-0.559621	2.62e-07	1.47e-07	-0.588673	3.73e-25	1.07e-25	-0.338157	5.05e-84	1.03e-84	-1.44329	6.45e-47	2.48e-47	-0.0851911	7.35e-19	2.2e-19	-0.219715	0.709129	0.668921	-0.0417122	1.09e-43	4.03e-44	-0.854614	0.0521593	0.0426013	-0.6307	9.07e-19	3.25e-19	-0.262879	1.64e-35	3.77e-36	-0.883666	4.62e-62	1e-62	0.588988	2.8e-131	5.59e-132	-1.48677
novel-ahy-miR80-5p	novel-ahy-miR80	2336	3812.67	2459.33	2683.67	7004	3867.33	9246.33	5400	0.313232	0	0	0.646399	0	0	0.102434	3.69e-48	8.65e-49	0.0221212	1.78e-36	5e-37	0.167536	0	0	0.942712	0	0	1.13387	0	0	-0.378913	1.89e-55	6.3e-56	0.0651017	0	0	0.441727	0	0	1.73729	0	0	-0.478863	1.42e-17	4.92e-18	-0.820641	3.27e-250	5.34e-251	1.48916
novel-ahy-miR112-3p	novel-ahy-miR112	3076	14164.3	5645	9504.33	661.667	3836.33	4784	3225	2.73829	0	0	1.94615	0	0	0.660593	0	0	-1.64036	0	0	1.4675	0	0	-1.42216	0	0	0.295166	1.17e-186	1.51e-187	2.18268	0	0	0.806902	0	0	-0.260444	0.0147178	0.00937293	-0.205952	3.02e-137	3.78e-138	-0.478652	1.39e-115	2.38e-116	2.44312	0	0	-2.13734
novel-ahy-miR92-5p	novel-ahy-miR92	3143.33	1458.33	1617.67	1107.33	3427.33	2032	2258.67	3056.67	-0.584313	8.36e-05	5.62e-05	-1.09976	2.61e-54	8.22e-55	-0.54432	1.44e-24	4.19e-25	0.482598	4.13e-14	1.67e-14	-1.48756	9.44e-68	3.19e-68	1.42651	0	0	0.149432	1.48e-44	3.66e-45	-0.177631	9.78e-104	2.58e-104	-0.943236	2.16e-07	1.33e-07	0.556115	0	0	0.475507	1.1e-30	2.8e-31	-0.387797	0.050363	0.0334014	-0.733746	9.44e-85	2.29e-85	0.116584
novel-ahy-miR222-5p	novel-ahy-miR222	3397.67	2798	2180	1544.67	595.333	1094.33	1367.33	1761.33	1.17959	0	0	-0.232622	7.97e-97	1.81e-97	-0.478766	2.2e-24	6.53e-25	-1.30434	0	0	-1.0447	0.000144762	9.95e-05	0.183176	0.00138707	0.00075924	0.31591	1.07e-54	2.38e-55	1.53911	0	0	-0.565937	1.66e-17	7.89e-18	0.675437	3.94e-215	5.18e-216	-0.655117	2.12e-193	2.43e-194	-0.812081	1.45e-93	2.79e-94	0.863678	4.54e-180	8.12e-181	-2.40064
novel-ahy-miR241-3p	novel-ahy-miR241	3433	1988	1649	968	1537.33	3366	1961	1413.33	0.352826	9e-208	1.91e-208	-0.753955	0.00274749	0.00179862	-0.759129	2.23e-62	4.89e-63	0.743577	1.42e-102	2.32e-103	-1.76772	7.59e-188	1.7e-188	0.526097	1.25e-13	4.28e-14	-0.757848	1.87e-134	2.89e-135	-0.120574	1.26e-57	4.07e-58	-1.00859	1.43e-21	6.16e-22	-1.23125	0	0	0.240368	0.00598504	0.00336659	-1.01377	4.77e-112	8.41e-113	1.11067	0	0	-1.12105
novel-ahy-miR19-5p	novel-ahy-miR19	3444.33	71.333	76.667	18.333	48.667	93.667	12	12	-2.00997	3.8e-10	2.29e-10	-5.36973	0	0	-2.05786	1.93e-21	6.04e-22	0.394568	0.376608	0.311278	-7.3231	0	0	-0.611408	0.00570517	0.00324294	-2.95935	2.12e-41	5.35e-42	-2.00997	4.62e-09	2.61e-09	-5.26524	0	0	-2.95935	8.11e-39	2.39e-39	-2.66927	9.31e-40	2.04e-40	-1.95338	1.69e-16	6.11e-17	0.949379	4.8e-18	2.05e-18	-5.92454
novel-ahy-miR2-5p	novel-ahy-miR2	3943.33	2876	3907.67	3223.33	5190.33	2113.67	3935	3416	-0.374955	1.27e-10	7.5e-11	-0.463882	6.69e-39	2.41e-39	-0.27458	0.00231354	0.00127727	-0.420419	1.01e-194	1.29e-195	-0.289479	0	0	0.0879956	7.19e-23	2.12e-23	0.885682	0	0	-0.577819	0.789134	0.772163	-0.0148992	0	0	0.682817	0	0	0.0162804	8.83e-17	2.76e-17	0.174403	1.03e-117	1.66e-118	-1.26064	0	0	0.376336
novel-ahy-miR33-5p	novel-ahy-miR33	4663.67	2987.33	2122.33	3016.67	1522.67	3572.67	2303.33	2943.33	0.591045	0	0	-0.623894	0.000131262	8.05e-05	0.491124	1.06e-208	1.22e-209	0.255989	0.914789	0.87745	-0.609027	2.7e-110	7.33e-111	-0.0313985	3.63e-50	8.21e-51	-0.615171	6.53e-84	1.18e-84	0.933695	0	0	-1.10015	1.62e-49	5.53e-50	-0.272521	0.332313	0.279843	0.117075	0.0664653	0.0429255	0.0148665	1.21e-56	2.77e-57	1.20622	0	0	-1.57412
novel-ahy-miR2-3p	novel-ahy-miR2	4744	4709	5726	6964.67	3429.67	2736	5167	8106.33	0.572305	0	0	0.0107035	0	0	0.264229	1.23e-247	1.15e-248	-0.760872	0	0	0.543218	0	0	0.197503	1.17e-06	5.29e-07	0.896833	0	0	1.16636	0	0	0.278989	0	0	1.49089	0	0	-0.132324	2.06e-87	3.33e-88	0.532515	0	0	-0.324528	0.420675	0.367537	-0.42564
novel-ahy-miR234-5p	novel-ahy-miR234	4801.33	3263.67	1898.33	1583	568.667	1550	2236	1264	1.92577	0	0	-0.418284	6.34e-18	2.94e-18	-0.254892	0.129528	0.0903999	-1.03343	0	0	-1.42315	2.77e-144	7.22e-145	-0.306686	1.31e-84	2.14e-85	0.508598	4.11e-159	5.93e-160	1.13906	0	0	-1.16826	3.86e-129	1.03e-129	-0.278117	0.827528	0.810106	0.225137	0.0150464	0.00916888	-1.00486	1.08e-185	1.39e-186	1.41718	0	0	-2.86889
ahy-miR3514-3p	ahy-MIR3514	5187	5961.67	6754	4887	6685.67	8151.33	7243	5970.67	0.110331	0	0	0.188748	0	0	-0.456297	3.03e-59	6.79e-60	0.439918	3.66e-41	9.52e-42	-0.0845559	0	0	0.267117	0.898011	0.888558	-0.17321	0.0139215	0.00868298	-0.162564	2.84e-203	5.81e-204	0.371741	0	0	-0.446105	2.36e-25	7.96e-26	0.0837157	3.01e-06	1.32e-06	-0.273304	0.0182388	0.0111512	0.283541	0	0	0.345125
novel-ahy-miR70-5p	novel-ahy-miR70	6146	3637	3008	3488	1673.33	3271	4067.33	2242.33	1.26367	0	0	-0.705313	0.0258525	0.0189229	0.198474	8.53e-95	1.56e-95	-0.131362	1.06e-94	1.84e-95	-0.754956	1.22e-41	4.84e-42	-0.631311	0	0	0.305834	1.36e-156	2.04e-157	0.408241	0	0	-0.953429	8.99e-30	3.62e-30	-0.549592	1.38e-26	4.56e-27	0.422588	2.19e-40	4.68e-41	-0.0496421	1.82e-41	4.62e-42	0.957832	0	0	-1.79451
novel-ahy-miR19-3p	novel-ahy-miR19	6326.33	585.333	852.667	364.667	986.333	1216.67	146.667	297	-2.73467	2.43e-304	4.5e-305	-3.32292	0	0	-1.20072	6.34e-91	1.19e-91	1.03921	3.96e-85	7.68e-86	-3.99669	0	0	-0.299965	7.43e-19	2.27e-19	-3.02767	0	0	-1.71995	8.41e-111	2.08e-111	-2.79598	0	0	-2.01295	1.63e-285	1.8e-286	-2.5154	0	0	-0.673773	1.85e-10	7.58e-11	0.293003	1.31e-65	3.39e-66	-2.57671
novel-ahy-miR114-3p	novel-ahy-miR114	6336.33	1149	867.333	288.333	1858	1552.67	882.667	371.333	-1.04624	8.87e-66	2.82e-66	-2.38362	0	0	-1.57377	9.52e-150	1.34e-150	0.430097	1.48e-07	7.31e-08	-4.35449	0	0	0.352689	0.285213	0.228171	-0.796083	1.31e-69	2.56e-70	-2.29844	0	0	-2.78072	0	0	-2.04828	0	0	0.0311111	0.000609832	0.000311268	-1.97087	1.35e-253	1.54e-254	-0.250158	0.119791	0.0926804	-1.70336
novel-ahy-miR135-3p	novel-ahy-miR135	6410.33	4558.33	4761.33	5767.33	2034.67	3404.33	3588.67	3933.67	0.807595	0	0	-0.466447	4.9e-46	1.67e-46	0.261607	1.17e-200	1.46e-201	-0.406467	1.18e-290	1.15e-291	-0.139371	0	0	-0.53006	0	0	0.0768432	5.49e-45	1.33e-45	0.934236	0	0	-0.400977	2.83e-147	7.11e-148	0.203484	6.75e-152	1.1e-152	-0.395094	1.13e-217	1.24e-218	0.327076	0	0	0.730752	0	0	-1.60367
novel-ahy-miR73-3p	novel-ahy-miR73	6524.67	1262.33	1483.33	779.667	1237	511.333	522.667	543.333	-1.22977	8.43e-70	2.59e-70	-2.29643	0	0	-0.914397	1.81e-87	3.58e-88	-1.29577	0	0	-2.98316	0	0	-0.519187	3.76e-68	6.73e-69	0.0336613	8.81e-06	4.54e-06	-1.17357	2e-45	7.33e-46	-2.06876	0	0	0.0898547	7.04e-14	2.71e-14	-1.48978	0	0	-0.68673	1.71e-22	5.32e-23	-1.26343	9.26e-119	1.9e-119	-2.32877
novel-ahy-miR157-5p	novel-ahy-miR157	6625.33	4974	4479.33	3971	4211.67	5418	6087.67	4163.67	0.510945	0	0	-0.376595	2.4e-87	5.7e-88	-0.164377	0.039396	0.0250329	0.114084	6.25e-17	2.36e-17	-0.685747	3.89e-82	1.22e-82	0.0705168	6.4e-32	1.58e-32	0.170073	7.52e-128	1.2e-128	-0.0118464	2.53e-237	4.62e-238	-0.52137	1.77e-64	5.76e-65	-0.352718	8.82e-06	4.41e-06	0.428931	4.66e-63	8.74e-64	-0.309151	0.924279	0.895545	0.340872	0	0	-0.603384
novel-ahy-miR26-3p	novel-ahy-miR26	6847	3976	4926.67	3699.33	4110.33	5504.33	5497	4589	0.397508	0	0	-0.715313	5.22e-05	3.09e-05	-0.398381	5.47e-28	1.51e-28	0.428744	2.64e-33	7.95e-34	-0.8274	4.13e-22	1.94e-22	0.290421	0.242549	0.185103	0.0032624	2.51e-37	6.86e-38	0.143837	0	0	-0.429019	8.47e-122	2.35e-122	-0.250409	0.0257931	0.0171049	0.145712	0.607476	0.512558	-0.112087	1.45e-31	4.19e-32	0.394246	0	0	-0.680815
ahy-miR156b-5p	ahy-MIR156b	6898.33	4973.33	3814.67	2932.67	8854.67	5608	5425.67	5237.67	-0.6605	2.51e-43	9.7e-44	-0.486732	1.21e-58	3.6e-59	-0.368004	1.23e-15	4.28e-16	0.186687	1e-07	4.9e-08	-1.19468	1.52e-28	6.49e-29	0.785445	1.22e-188	1.55e-189	-0.0290857	5.12e-23	1.69e-23	-0.740602	9.52e-26	4.15e-26	-0.826674	0.150737	0.129429	-0.109188	8.13e-37	2.48e-37	0.497543	6.28e-84	1.05e-84	-0.707946	1.4e-115	2.33e-116	-0.631415	1.18e-139	2.24e-140	0.33137
novel-ahy-miR45-5p	novel-ahy-miR45	7525.67	37262.3	14644	15894	2929.67	11574.3	14270.3	7943	2.11078	0	0	1.87227	0	0	0.0357121	1.81e-270	1.6e-271	-1.31867	0	0	0.893958	0	0	-0.831949	0	0	0.278724	0	0	1.34046	0	0	0.858246	0	0	-0.491593	4.09e-90	9.03e-91	-0.0259195	7.87e-99	1.15e-99	-0.978309	0	0	1.83206	0	0	-1.27846
novel-ahy-miR30-5p	novel-ahy-miR30	8579	3432.33	3770.33	3601.33	5396.67	4823.33	4793.33	5326.33	-0.154848	3.46e-96	9.32e-97	-1.21041	0	0	-0.0702866	5.14e-14	1.87e-14	0.455645	3.5e-35	9.99e-36	-1.14514	9.52e-42	3.72e-42	0.506266	8.81e-55	1.81e-55	-0.00616784	1.29e-30	3.72e-31	-0.0327888	2.86e-301	4.91e-302	-1.07486	1.54e-119	4.35e-120	0.115891	4.98e-160	7.6e-161	0.313921	2.17e-22	6.1e-23	0.0652698	7.91e-89	1.56e-89	-0.14868	2.61e-18	1.1e-18	-0.606089
novel-ahy-miR84-5p	novel-ahy-miR84	10259.3	6958	8998	7509.33	4073.33	7103.67	6822	3469.67	0.695617	0	0	-0.507092	2.16e-35	8.14e-36	-0.247433	0.000573304	0.000304568	0.0278002	6.35e-61	1.43e-61	-0.408685	0	0	-1.03273	0	0	-0.0414745	3.86e-25	1.19e-25	-0.225029	1.94e-87	5.33e-88	-0.161252	0	0	-0.962121	0	0	-0.359514	0	0	0.0984063	9.52e-221	1.18e-221	0.737092	0	0	-1.21638
novel-ahy-miR65-3p	novel-ahy-miR65	10485.3	3944	5667.67	4220.33	8746.33	8201.33	5409	7085.33	-0.638118	1.71e-37	6.8e-38	-1.30221	0	0	-0.405111	9.75e-36	2.54e-36	0.997861	0	0	-1.20381	5.29e-82	1.71e-82	0.666743	4.48e-185	5.89e-186	-0.5715	2.49e-165	3.47e-166	-0.299341	2.33e-119	5.51e-120	-0.7987	1.9e-05	1.26e-05	-0.232722	2.98e-11	1.28e-11	-0.0771448	6.19e-50	1.22e-50	0.0983952	6.65e-118	1.03e-118	-0.0666187	6.14e-63	1.65e-63	-0.237726
novel-ahy-miR54-5p	novel-ahy-miR54	11413.3	5980.67	7042	5465.67	7171.67	9370.67	5368.33	8617.33	-0.404502	2.74e-10	1.64e-10	-0.835419	1.78e-63	4.86e-64	-0.348993	9.26e-24	2.8e-24	0.608056	2.6e-178	3.45e-179	-0.94522	0.192297	0.167258	0.562208	2.38e-150	3.26e-151	-0.761729	0	0	0.201579	0	0	-0.596227	9.17e-28	3.74e-28	-0.155649	4.51e-48	1.24e-48	-0.392865	1.1e-305	1.08e-306	-0.109801	1.22e-36	3.35e-37	0.357228	0	0	-0.584591
novel-ahy-miR14-3p	novel-ahy-miR14	11872	23744.7	23854	24839	14718.7	24675.7	20439.7	22308	0.405834	0	0	0.75349	0	0	0.0042143	3.82e-293	3.19e-294	0.0813431	5.33e-166	7.34e-167	0.825938	0	0	-0.105392	0	0	-0.195192	4.83e-17	1.74e-17	0.48674	0	0	0.821724	0	0	-0.114287	1.51e-93	3.26e-94	-0.182083	0	0	0.0724482	0	0	0.601026	0	0	0.233806
novel-ahy-miR157-3p	novel-ahy-miR157	14676.7	7977.33	7819	6270.67	9346	11757	9779	7035.67	0.0717538	0	0	-0.778674	8.44e-48	2.78e-48	-0.313212	2.87e-13	1.06e-13	0.535144	7.05e-138	1.01e-138	-1.09022	3.5e-55	1.28e-55	0.128954	1.47e-16	4.56e-17	-0.256909	2.12e-07	1.02e-07	-0.389074	2.77e-53	9.52e-54	-0.777008	3.6e-12	1.94e-12	-0.717736	2.08e-279	2.41e-280	0.27657	4.44e-34	1.04e-34	-0.311546	0.194179	0.148904	0.328662	0	0	-0.572192
novel-ahy-miR78-3p	novel-ahy-miR78	14917.3	9268.67	10567	7932.67	10403.7	14169.3	11791.7	10203.7	0.1418	0	0	-0.60791	0.00560815	0.00381585	-0.357952	4.08e-59	9.35e-60	0.521356	1.59e-225	1.86e-226	-0.799212	3.73e-34	1.52e-34	0.269529	1.4e-09	5.45e-10	-0.222407	1.71e-08	7.6e-09	-0.078922	0	0	-0.44126	1.03e-230	2.38e-231	-0.443128	6.61e-58	1.6e-58	0.132299	0.443058	0.343831	-0.191302	1.14e-15	4.19e-16	0.364206	0	0	-0.45076
novel-ahy-miR15-5p	novel-ahy-miR15	16121	8316	16181	14771.7	26036	23543	25203	36504	-0.0375381	0	0	-0.886685	6.9e-108	1.46e-108	-0.160153	3.22e-18	1.06e-18	1.25143	0	0	-0.172299	0	0	0.853518	0	0	0.0646037	0	0	0.214334	0	0	-0.0121456	0	0	0.316476	0	0	0.441493	0	0	0.714386	0	0	-0.102142	3.32e-105	7.35e-106	0.466886
novel-ahy-miR61-3p	novel-ahy-miR61	16409.3	1589.67	1333.67	509.333	2624.33	1591.33	278.667	614.667	-3.17358	0	0	-2.9621	0	0	-1.35918	5.93e-180	7.72e-181	0.0106041	3.08e-18	1.15e-18	-4.56819	0	0	0.264779	0.792251	0.754724	-2.4804	0	0	-2.04509	0	0	-3.20901	0	0	-1.35191	6.3e-180	8.62e-181	-2.22289	0	0	-1.60609	1.14e-246	1.36e-247	-0.693179	6.61e-57	1.88e-57	-2.25832
novel-ahy-miR86-3p	novel-ahy-miR86	19224	16502.7	18221	11758.7	23734.7	18642.7	21436	14421.7	-0.115251	0	0	-0.224351	0	0	-0.54243	0	0	0.157786	8.94e-22	3.15e-22	-0.627052	1.78e-287	3.63e-288	0.237992	0.522245	0.445283	0.138784	0	0	-0.576529	6.49e-38	2.55e-38	-0.084622	0	0	-0.322494	1.31e-13	5.17e-14	0.15684	6.62e-15	2.21e-15	-0.4027	1.15e-59	2.57e-60	-0.254035	4.51e-07	2.45e-07	0.187469
novel-ahy-miR20-3p	novel-ahy-miR20	19739	10635.3	8463.67	6835	10444.3	8026.33	8383.33	7825.33	-0.286668	1.01e-58	3.37e-59	-0.820691	1.02e-73	2.62e-74	-0.339764	6.48e-12	2.5e-12	-0.366009	0	0	-1.4302	0	0	0.198507	6.07e-11	2.3e-11	0.079639	1.08e-94	1.84e-95	-0.411301	2.24e-55	7.59e-56	-1.09044	0	0	-0.0449945	8.02e-90	1.81e-90	-0.0166237	1.32e-45	2.68e-46	-0.60951	3.94e-132	5.51e-133	-0.366307	4.69e-09	2.42e-09	-0.820393
novel-ahy-miR71-3p	novel-ahy-miR71	22670	11386.3	15751.7	10248.3	24305.7	24116.3	19206.7	17710.3	-0.284584	8.14e-106	2.07e-106	-0.873965	1.31e-201	2.5e-202	-0.563581	0	0	0.950263	0	0	-1.00235	1.09e-27	4.75e-28	0.660484	0	0	-0.312487	2.78e-53	6.3e-54	-0.390266	1.51e-79	4.39e-80	-0.438773	1.36e-292	3.07e-293	-0.418168	9.53e-70	2.21e-70	0.202584	1.56e-39	3.49e-40	-0.128389	2.81e-54	6.55e-55	0.0279028	0	0	0.048396
novel-ahy-miR97-5p	novel-ahy-miR97	27083	10618.7	8668.67	5922.67	19339.3	16458	11250.3	10423.3	-0.679277	2.23e-173	4.85e-174	-1.19236	0	0	-0.527511	8.09e-129	1.26e-129	0.595745	1.9e-290	1.94e-291	-1.96778	0	0	0.711193	0	0	-0.496209	7.04e-256	7.25e-257	-0.84304	1.28e-185	2.68e-186	-1.44027	0	0	-0.659971	2.03e-267	2.46e-268	0.347444	1.49e-68	2.65e-69	-0.77542	0	0	-0.183068	4.91e-17	2.15e-17	-0.413545
novel-ahy-miR20-5p	novel-ahy-miR20	27403	17259	16645	20907	18683.3	16506.7	18655.7	19997.7	0.0301987	0	0	-0.566483	2.05e-10	1.07e-10	0.197727	0	0	0.0167839	8.54e-287	9.15e-288	-0.351102	0	0	-0.0424943	0	0	0.142832	0	0	0.0434691	0	0	-0.548829	3.33e-45	1.22e-45	0.156103	0	0	0.141962	0.705459	0.635648	0.215381	0	0	-0.112634	1.84e-47	5.51e-48	-0.437065
ahy-miR3508	ahy-MIR3508	34011.3	25180.3	29700	21733.7	16495.7	22069.3	30344.3	30826.7	0.674939	0	0	-0.282064	0	0	-0.378403	2.47e-230	2.57e-231	-0.0680717	0	0	-0.446191	0	0	0.391468	1.44e-199	1.75e-200	0.33789	0	0	0.632462	0	0	-0.0677876	0	0	0.295413	0	0	0.0555424	2.91e-93	4.4e-94	-0.164127	3.19e-51	7.6e-52	0.337049	0	0	-0.687185
novel-ahy-miR128-3p	novel-ahy-miR128	39576.3	18292.3	16451.7	19948.3	11715	16698	13339.3	11696.3	0.21125	0	0	-0.654642	0	0	0.188542	0	0	-0.0909135	0	0	-0.576489	1.26e-16	6.39e-17	-0.596053	0	0	-0.251716	1.22e-34	3.46e-35	0.0359801	0	0	-0.765031	0	0	-0.426986	2.31e-101	4.87e-102	-0.232242	0	0	0.078154	0	0	0.462966	0	0	-1.20852
novel-ahy-miR102-3p	novel-ahy-miR102	48635.7	15383.7	23315.7	7502.33	5632	8048.67	6340.33	4944	0.175644	0	0	-1.1963	0	0	-1.47475	0	0	-0.795944	0	0	-2.10816	0	0	-0.571986	0	0	-0.328288	5.17e-23	1.68e-23	-0.183973	1.19e-151	2.55e-152	-0.633411	6.35e-301	1.33e-301	-0.687905	3.89e-162	5.73e-163	-1.68712	0	0	-0.911863	0	0	0.503932	0	0	-2.49618
novel-ahy-miR234-3p	novel-ahy-miR234	57100.7	55598	51826.7	52462	43944.3	43424	58377	42584	0.281255	0	0	-0.123709	0	0	-0.0368571	0	0	-0.172436	0	0	-0.183771	0	0	-0.147247	0	0	0.274498	0	0	-0.0281162	0	0	-0.146914	0	0	-0.0348732	0	0	0.125267	0.624638	0.536798	-0.060062	0	0	0.00675702	0	0	-0.302902
ahy-miR159	ahy-MIR159	64870	44438	48387	50031.7	56912	57375	67402.7	57824	0.151053	0	0	-0.427406	2.37e-267	4.28e-268	-0.0343126	0	0	0.280172	5.99e-97	1.01e-97	-0.321336	0	0	0.135605	8.88e-56	1.68e-56	0.116502	0	0	-0.00394571	0	0	-0.287023	0	0	-0.0384968	0	0	0.256292	0	0	0.10607	0	0	0.0345511	0	0	-0.181785
novel-ahy-miR89-3p	novel-ahy-miR89	65867.7	14837	13703	4478.33	18602.3	16955.7	10300.7	4772.67	-0.618224	3.22e-259	6.46e-260	-1.52819	0	0	-1.40307	0	0	0.169564	2.85e-13	1.21e-13	-3.01096	0	0	0.0681968	4.73e-29	1.25e-29	-0.564413	0	0	-1.63795	0	0	-1.60788	0	0	-1.58414	0	0	-0.315153	0	0	-1.48277	0	0	-0.0538111	2.12e-86	5.02e-87	-1.30481
novel-ahy-miR197-3p	novel-ahy-miR197	66989	30650.7	26932.7	29526.7	85625	34854.3	32852.7	39210.7	-0.801516	0	0	-0.819629	0	0	0.0449308	0	0	0.169304	7.85e-32	2.4e-32	-0.872596	5.83e-147	1.49e-147	0.248954	1.05e-84	1.65e-85	-0.0578958	2.1e-80	4.01e-81	-0.716937	0	0	-0.917527	0	0	0.0266833	0	0	0.209305	3.8e-68	6.93e-69	-0.0529668	0	0	-0.74362	0	0	0.0932942
novel-ahy-miR148-3p	novel-ahy-miR148	118698	72943	62439.3	49064.3	111798	85411.7	83512.7	73749.7	-0.189108	7.76e-141	1.72e-141	-0.547408	8.03e-05	4.8e-05	-0.293307	2.56e-166	3.47e-167	0.208684	2.08e-16	7.94e-17	-0.910357	0	0	0.346211	0	0	0.0023874	0	0	-0.416917	0.0295956	0.0221171	-0.61705	1.57e-141	4.1e-142	-0.225422	2.89e-110	5.64e-111	0.280714	0	0	-0.362949	0	0	-0.191495	2.75e-111	5.78e-112	-0.147228
novel-ahy-miR10-3p	novel-ahy-miR10	173521	90474	75002	44050.3	80123.3	93904.3	75301.3	63741.3	-0.0210521	0	0	-0.648682	0	0	-0.54078	0	0	0.123235	0	0	-1.27749	0	0	0.333311	0	0	-0.188955	9.31e-183	1.25e-183	-0.25083	0	0	-0.736711	0	0	-0.418733	0	0	0.022309	0	0	-0.628809	0	0	0.167903	0	0	-0.69335
novel-ahy-miR136-3p	novel-ahy-miR136	265266	148955	107379	85453.7	314374	282238	121725	144336	-0.547588	0	0	-0.556344	0	0	-0.394858	1.3e-224	1.43e-225	0.516419	0	0	-1.06921	0	0	0.412338	0	0	-0.560189	0	0	-0.604345	0	0	-0.67435	0	0	-0.616946	0	0	0.0742359	0.000391252	0.000195626	-0.512864	0	0	0.0126007	0	0	-0.0525256
novel-ahy-miR70-3p	novel-ahy-miR70	409879	254111	250875	240134	533851	304711	298129	276666	-0.215031	0	0	-0.463901	8.31e-54	2.66e-54	-0.137799	0	0	0.233629	0.777805	0.730185	-0.494033	0	0	0.137513	0	0	-0.0377514	0	0	-0.303527	0	0	-0.356234	0	0	-0.126247	0	0	0.0882097	0	0	-0.0301312	0	0	-0.17728	0	0	-0.0529927
[truncated: 8 more columns]
